# Supplementary material for: Comparative Analysis of the Systematics and Evolution of the Pampus Genus of Fish (Perciformes: Stromateidae) Based on Osteology, Population Genetics and Complete Mitogenomes
Source: MDPI journal article supplement (doi:10.3390/ani14050814), 2024-03-06
Supplement: s1 [file s1]

Table S3. The optimal codon analysis of the 13 protein coding genes of the genus *Pampus*

| Species            | Amino acid | Codon | high-expression gene ( <i>atp6</i> ) |      | low-expression gene ( <i>nad6</i> ) |      | $\Delta$ RSCU |
|--------------------|------------|-------|--------------------------------------|------|-------------------------------------|------|---------------|
|                    |            |       | Number                               | RSCU | Number                              | RSCU |               |
| <i>P. cinereus</i> | Phe        | UUU   | 8                                    | 1.23 | 9                                   | 1.8  | -0.57         |
|                    |            | UUC   | 5                                    | 0.77 | 1                                   | 0.2  | 0.57          |
|                    | Leu        | UUA   | 13                                   | 1.47 | 13                                  | 2.69 | -1.22         |
|                    |            | UUG   | 4                                    | 0.45 | 10                                  | 2.07 | -1.62         |
|                    |            | CUU   | 8                                    | 0.91 | 4                                   | 0.83 | 0.08          |
|                    |            | CUC*  | 10                                   | 1.13 | 0                                   | 0    | 1.13          |
|                    |            | CUA*  | 12                                   | 1.36 | 1                                   | 0.21 | 1.15          |
|                    | Ile        | CUG   | 6                                    | 0.68 | 1                                   | 0.21 | 0.47          |
|                    |            | AUU   | 14                                   | 1.68 | 5                                   | 1.67 | 0.01          |
|                    |            | AUC   | 6                                    | 0.72 | 1                                   | 0.33 | 0.39          |
|                    |            | AUA   | 5                                    | 0.6  | 3                                   | 1    | -0.4          |
|                    | Met        | AUG   | 1                                    | 1    | 6                                   | 1    | 0             |
|                    | Val        | GUU   | 6                                    | 1.6  | 13                                  | 2.08 | -0.48         |
|                    |            | GUC   | 2                                    | 0.53 | 0                                   | 0    | 0.53          |
|                    |            | GUA*  | 7                                    | 1.87 | 6                                   | 0.96 | 0.91          |
|                    |            | GUG   | 0                                    | 0    | 6                                   | 0.96 | -0.96         |
|                    | Ser        | UCU   | 0                                    | 0    | 6                                   | 3.27 | -3.27         |
|                    |            | UCC*  | 2                                    | 1.33 | 0                                   | 0    | 1.33          |
|                    |            | UCA   | 2                                    | 1.33 | 2                                   | 1.09 | 0.24          |
|                    |            | UCG   | 0                                    | 0    | 0                                   | 0    | 0             |
|                    | Pro        | CCU*  | 6                                    | 1.41 | 1                                   | 0.67 | 0.74          |
|                    |            | CCC   | 4                                    | 0.94 | 1                                   | 0.67 | 0.27          |
|                    |            | CCA   | 7                                    | 1.65 | 2                                   | 1.33 | 0.32          |
|                    |            | CCG   | 0                                    | 0    | 2                                   | 1.33 | -1.33         |
|                    | Thr        | ACU   | 5                                    | 1    | 3                                   | 4    | -3            |
|                    |            | ACC*  | 5                                    | 1    | 0                                   | 0    | 1             |
|                    |            | ACA*  | 9                                    | 1.8  | 0                                   | 0    | 1.8           |
|                    |            | ACG   | 1                                    | 0.2  | 0                                   | 0    | 0.2           |
|                    | Ala        | GCU   | 5                                    | 1.11 | 11                                  | 2.75 | -1.64         |
|                    |            | GCC*  | 6                                    | 1.33 | 0                                   | 0    | 1.33          |
|                    |            | GCA*  | 7                                    | 1.56 | 1                                   | 0.25 | 1.31          |
|                    |            | GCG   | 0                                    | 0    | 4                                   | 1    | -1            |
|                    | Tyr        | UAU   | 2                                    | 0.67 | 9                                   | 2    | -1.33         |
|                    |            | UAC*  | 4                                    | 1.33 | 0                                   | 0    | 1.33          |
|                    | TER        | UAA   | 1                                    | 0.5  | 0                                   | 0    | 0.5           |
|                    |            | UAG   | 0                                    | 0    | 1                                   | 1    | -1            |
|                    | His        | CAU   | 2                                    | 1    | 0                                   | 0    | 1             |
|                    |            | CAC*  | 2                                    | 1    | 0                                   | 0    | 1             |
|                    | Gln        | CAA*  | 6                                    | 1.5  | 0                                   | 0    | 1.5           |
|                    |            | CAG   | 2                                    | 0.5  | 0                                   | 0    | 0.5           |
|                    | Asn        | AAU   | 4                                    | 0.73 | 0                                   | 0    | 0.73          |
|                    |            | AAC*  | 7                                    | 1.27 | 2                                   | 2    | -0.73         |
|                    | Lys        | AAA   | 4                                    | 2    | 0                                   | 0    | 2             |
|                    |            | AAG   | 0                                    | 0    | 0                                   | 0    | 0             |
|                    | Asp        | GAU   | 0                                    | 0    | 3                                   | 2    | -2            |
|                    |            | GAC   | 0                                    | 0    | 0                                   | 0    | 0             |
|                    | Glu        | GAA*  | 6                                    | 1.71 | 0                                   | 0    | 1.71          |
|                    |            | GAG   | 1                                    | 0.29 | 5                                   | 2    | -1.71         |
|                    | Cys        | UGU   | 1                                    | 2    | 3                                   | 2    | 0             |
|                    |            | UGC   | 0                                    | 0    | 0                                   | 0    | 0             |
|                    | TER        | UGA   | 5                                    | 2.5  | 2                                   | 2    | 0.5           |
|                    | Trp        | UGG   | 0                                    | 0    | 3                                   | 1    | -1            |
|                    | Arg        | CGU   | 2                                    | 2.4  | 0                                   | 0    | 2.4           |
|                    |            | CGC   | 0                                    | 0    | 0                                   | 0    | 0             |
|                    |            | CGA   | 3                                    | 3.6  | 2                                   | 3    | 0.6           |
|                    |            | CGG   | 0                                    | 0    | 2                                   | 3    | -3            |
|                    | Ser        | AGU   | 3                                    | 2    | 3                                   | 1.64 | 0.36          |
|                    |            | AGC   | 2                                    | 1.33 | 0                                   | 0    | 1.33          |
|                    | Arg        | AGA   | 0                                    | 0    | 0                                   | 0    | 0             |
|                    |            | AGG   | 0                                    | 0    | 0                                   | 0    | 0             |
|                    | Gly        | GGU   | 1                                    | 0.57 | 6                                   | 1.04 | -0.47         |
|                    |            | GGC*  | 4                                    | 2.29 | 1                                   | 0.17 | 2.12          |
|                    |            | GGA   | 2                                    | 1.14 | 7                                   | 1.22 | -0.08         |
|                    |            | GGG   | 0                                    | 0    | 9                                   | 1.57 | -1.57         |

\*Indicated the optimal codons

| Species                | Amino acid | Codon | high-expression gene ( <i>nd4l</i> ) |      | low-expression gene ( <i>nd6</i> ) |      | $\Delta$ RSCU |
|------------------------|------------|-------|--------------------------------------|------|------------------------------------|------|---------------|
|                        |            |       | Number                               | RSCU | Number                             | RSCU |               |
| <i>P. echinogaster</i> | Phe        | UUU   | 2                                    | 0.57 | 12                                 | 2    | -1.43         |
|                        |            | UUC*  | 5                                    | 1.43 | 0                                  | 0    | 1.43          |
|                        | Leu        | UUA   | 1                                    | 0.26 | 17                                 | 3.52 | -3.26         |
|                        |            | UUG   | 0                                    | 0    | 7                                  | 1.45 | -1.45         |
|                        |            | CUU*  | 7                                    | 1.83 | 3                                  | 0.62 | 1.21          |
|                        |            | CUC   | 2                                    | 0.52 | 1                                  | 0.21 | 0.31          |
|                        |            | CUA*  | 12                                   | 3.13 | 1                                  | 0.21 | 2.92          |
|                        |            | CUG   | 1                                    | 0.26 | 0                                  | 0    | 0.26          |
|                        | Ile        | AUU   | 3                                    | 1.13 | 7                                  | 1.91 | -0.78         |
|                        |            | AUC   | 0                                    | 0    | 0                                  | 0    | 0             |
|                        |            | AUA   | 5                                    | 1.88 | 4                                  | 1.09 | 0.79          |
|                        | Met        | AUG   | 1                                    | 1    | 4                                  | 1    | 0             |
|                        | Val        | GUU   | 0                                    | 0    | 11                                 | 1.83 | -1.83         |
|                        |            | GUC   | 0                                    | 0    | 1                                  | 0.17 | -0.17         |
|                        |            | GUA   | 1                                    | 4    | 9                                  | 1.5  | 2.5           |
|                        |            | GUG   | 0                                    | 0    | 3                                  | 0.5  | -0.5          |
|                        | Ser        | UCU   | 2                                    | 1.09 | 5                                  | 2.5  | -1.41         |
|                        |            | UCC   | 1                                    | 0.55 | 1                                  | 0.5  | 0.05          |
|                        |            | UCA*  | 6                                    | 3.27 | 1                                  | 0.5  | 2.77          |
|                        |            | UCG   | 1                                    | 0.55 | 2                                  | 1    | -0.45         |
|                        | Pro        | CCU   | 1                                    | 2    | 2                                  | 1.33 | 0.67          |
|                        |            | CCC   | 0                                    | 0    | 0                                  | 0    | 0             |
|                        |            | CCA*  | 1                                    | 2    | 1                                  | 0.67 | 1.33          |
|                        |            | CCG   | 0                                    | 0    | 3                                  | 2    | -2            |
|                        | Thr        | ACU   | 1                                    | 0.8  | 2                                  | 4    | -3.2          |
|                        |            | ACC*  | 4                                    | 3.2  | 0                                  | 0    | 3.2           |
|                        |            | ACA   | 0                                    | 0    | 0                                  | 0    | 0             |
|                        |            | ACG   | 0                                    | 0    | 0                                  | 0    | 0             |
|                        | Ala        | GCU   | 3                                    | 0.92 | 9                                  | 2.12 | -1.2          |
|                        |            | GCC*  | 5                                    | 1.54 | 0                                  | 0    | 1.54          |
|                        |            | GCA   | 5                                    | 1.54 | 5                                  | 1.18 | 0.36          |
|                        |            | GCG   | 0                                    | 0    | 3                                  | 0.71 | -0.71         |
|                        | Tyr        | UAU   | 0                                    | 0    | 10                                 | 1.82 | -1.82         |
|                        |            | UAC   | 0                                    | 0    | 1                                  | 0.18 | -0.18         |
|                        | TER        | UAA   | 1                                    | 1.5  | 1                                  | 0.75 | 0.75          |
|                        |            | UAG   | 0                                    | 0    | 0                                  | 0    | 0             |
|                        | His        | CAU   | 2                                    | 1.33 | 1                                  | 2    | -0.67         |
|                        |            | CAC   | 1                                    | 0.67 | 0                                  | 0    | 0.67          |
|                        | Gln        | CAA   | 2                                    | 1.33 | 2                                  | 1.33 | 0             |
|                        |            | CAG   | 1                                    | 0.67 | 1                                  | 0.67 | 0             |
|                        | Asn        | AAU   | 4                                    | 1.14 | 4                                  | 2    | -0.86         |
|                        |            | AAC   | 3                                    | 0.86 | 0                                  | 0    | 0.86          |
|                        | Lys        | AAA   | 0                                    | 0    | 0                                  | 0    | 0             |
|                        |            | AAG   | 0                                    | 0    | 1                                  | 2    | -2            |
|                        | Asp        | GAU   | 0                                    | 0    | 1                                  | 1    | -1            |
|                        |            | GAC   | 1                                    | 2    | 1                                  | 1    | 1             |
|                        | Glu        | GAA*  | 1                                    | 1    | 1                                  | 0.4  | 0.6           |
|                        |            | GAG   | 1                                    | 1    | 4                                  | 1.6  | -0.6          |
|                        | Cys        | UGU   | 1                                    | 0.67 | 1                                  | 2    | -1.33         |
|                        |            | UGC*  | 2                                    | 1.33 | 0                                  | 0    | 1.33          |
|                        | TER        | UGA   | 1                                    | 1.5  | 3                                  | 2.25 | -0.75         |
|                        | Trp        | UGG   | 0                                    | 0    | 1                                  | 1    | -1            |
|                        | Arg        | CGU   | 0                                    | 0    | 0                                  | 0    | 0             |
|                        |            | CGC   | 1                                    | 2    | 0                                  | 0    | 2             |
|                        |            | CGA   | 2                                    | 4    | 1                                  | 1.2  | 2.8           |
|                        |            | CGG   | 0                                    | 0    | 4                                  | 4.8  | -4.8          |
|                        | Ser        | AGU   | 0                                    | 0    | 3                                  | 1.5  | -1.5          |
|                        |            | AGC   | 1                                    | 0.55 | 0                                  | 0    | 0.55          |
|                        | Arg        | AGA   | 0                                    | 0    | 0                                  | 0    | 0             |
|                        |            | AGG   | 0                                    | 0    | 0                                  | 0    | 0             |
|                        | Gly        | GGU   | 1                                    | 1    | 7                                  | 1.47 | -0.47         |
|                        |            | GGC*  | 2                                    | 2    | 1                                  | 0.21 | 1.79          |
|                        |            | GGA   | 1                                    | 1    | 5                                  | 1.05 | -0.05         |
|                        |            | GGG   | 0                                    | 0    | 6                                  | 1.26 | -1.26         |

\*Indicated the optimal codons

| Species                  | Amino acid | Codon | high-expression gene ( <i>nd4l</i> ) |      | low-expression gene ( <i>nad6</i> ) |      | $\Delta$ RSCU |
|--------------------------|------------|-------|--------------------------------------|------|-------------------------------------|------|---------------|
|                          |            |       | Number                               | RSCU | Number                              | RSCU |               |
| <i>P. punctatissimus</i> | Phe        | UUU   | 10                                   | 1.43 | 3                                   | 0.75 | 0.68          |
|                          |            | UUC   | 4                                    | 0.57 | 5                                   | 1.25 | -0.68         |
|                          | Leu        | UUA*  | 9                                    | 1    | 4                                   | 0.89 | 0.11          |
|                          |            | UUG   | 3                                    | 0.33 | 1                                   | 0.22 | 0.11          |
|                          |            | CUU   | 8                                    | 0.89 | 5                                   | 1.11 | -0.22         |
|                          |            | CUC   | 6                                    | 0.67 | 6                                   | 1.33 | -0.66         |
|                          |            | CUA   | 23                                   | 2.56 | 9                                   | 2    | 0.56          |
|                          |            | CUG   | 5                                    | 0.56 | 2                                   | 0.44 | 0.12          |
|                          | Ile        | AUU   | 13                                   | 1.86 | 8                                   | 1.71 | 0.15          |
|                          |            | AUC   | 5                                    | 0.71 | 5                                   | 1.07 | -0.36         |
|                          |            | AUA   | 3                                    | 0.43 | 1                                   | 0.21 | 0.22          |
|                          | Met        | AUG   | 0                                    | 0    | 2                                   | 1    | -1            |
|                          | Val        | GUU*  | 6                                    | 1.6  | 0                                   | 0    | 1.6           |
|                          |            | GUC   | 3                                    | 0.8  | 0                                   | 0    | 0.8           |
|                          |            | GUA   | 5                                    | 1.33 | 2                                   | 4    | -2.67         |
|                          |            | GUG   | 1                                    | 0.27 | 0                                   | 0    | 0.27          |
|                          | Ser        | UCU   | 1                                    | 0.75 | 2                                   | 1.71 | -0.96         |
|                          |            | UCC   | 0                                    | 0    | 1                                   | 0.86 | -0.86         |
|                          |            | UCA   | 2                                    | 1.5  | 4                                   | 3.43 | -1.93         |
|                          |            | UCG   | 0                                    | 0    | 0                                   | 0    | 0             |
|                          | Pro        | CCU*  | 6                                    | 1.41 | 2                                   | 0.89 | 0.52          |
|                          |            | CCC   | 3                                    | 0.71 | 3                                   | 1.33 | -0.62         |
|                          |            | CCA   | 7                                    | 1.65 | 4                                   | 1.78 | -0.13         |
|                          |            | CCG   | 1                                    | 0.24 | 0                                   | 0    | 0.24          |
|                          | Thr        | ACU   | 7                                    | 1.08 | 1                                   | 0.5  | 0.58          |
|                          |            | ACC   | 7                                    | 1.08 | 3                                   | 1.5  | -0.42         |
|                          |            | ACA   | 12                                   | 1.85 | 4                                   | 2    | -0.15         |
|                          |            | ACG   | 0                                    | 0    | 0                                   | 0    | 0             |
|                          | Ala        | GCU   | 6                                    | 1.2  | 4                                   | 2.29 | -1.09         |
|                          |            | GCC   | 7                                    | 1.4  | 2                                   | 1.14 | 0.26          |
|                          |            | GCA*  | 5                                    | 1    | 1                                   | 0.57 | 0.43          |
|                          |            | GCG   | 2                                    | 0.4  | 0                                   | 0    | 0.4           |
|                          | Tyr        | UAU   | 2                                    | 0.8  | 0                                   | 0    | 0.8           |
|                          |            | UAC   | 3                                    | 1.2  | 2                                   | 2    | -0.8          |
|                          | TER        | UAA   | 1                                    | 0.5  | 0                                   | 0    | 0.5           |
|                          |            | UAG   | 0                                    | 0    | 0                                   | 0    | 0             |
|                          | His        | CAU   | 2                                    | 1    | 0                                   | 0    | 1             |
|                          |            | CAC   | 2                                    | 1    | 1                                   | 2    | -1            |
|                          | Gln        | CAA   | 9                                    | 2    | 2                                   | 2    | 0             |
|                          |            | CAG   | 0                                    | 0    | 0                                   | 0    | 0             |
|                          | Asn        | AAU   | 3                                    | 0.75 | 0                                   | 0    | 0.75          |
|                          |            | AAC   | 5                                    | 1.25 | 2                                   | 2    | -0.75         |
|                          | Lys        | AAA   | 4                                    | 1.6  | 1                                   | 2    | -0.4          |
|                          |            | AAG   | 1                                    | 0.4  | 0                                   | 0    | 0.4           |
|                          | Asp        | GAU   | 1                                    | 2    | 0                                   | 0    | 2             |
|                          |            | GAC   | 0                                    | 0    | 4                                   | 2    | -2            |
|                          | Glu        | GAA   | 6                                    | 2    | 6                                   | 2    | 0             |
|                          |            | GAG   | 0                                    | 0    | 0                                   | 0    | 0             |
|                          | Cys        | UGU   | 0                                    | 0    | 0                                   | 0    | 0             |
|                          |            | UGC   | 0                                    | 0    | 1                                   | 2    | -2            |
|                          | TER        | UGA   | 5                                    | 2.5  | 4                                   | 3    | -0.5          |
|                          | Trp        | UGG   | 0                                    | 0    | 1                                   | 1    | -1            |
|                          | Arg        | CGU   | 0                                    | 0    | 0                                   | 0    | 0             |
|                          |            | CGC   | 2                                    | 3    | 1                                   | 3    | 0             |
|                          |            | CGA   | 2                                    | 3    | 1                                   | 3    | 0             |
|                          |            | CGG   | 0                                    | 0    | 0                                   | 0    | 0             |
|                          |            | AGU   | 2                                    | 1.5  | 0                                   | 0    | 1.5           |
|                          | Arg        | AGC   | 3                                    | 2.25 | 0                                   | 0    | 2.25          |
|                          |            | AGA   | 0                                    | 0    | 0                                   | 0    | 0             |
|                          |            | AGG   | 0                                    | 0    | 0                                   | 0    | 0             |
|                          | Gly        | GGU   | 1                                    | 0.57 | 1                                   | 0.67 | -0.1          |
|                          |            | GGC   | 4                                    | 2.29 | 3                                   | 2    | 0.29          |
|                          |            | GGA   | 2                                    | 1.14 | 2                                   | 1.33 | -0.19         |
|                          |            | GGG   | 0                                    | 0    | 0                                   | 0    | 0             |

\*Indicated the optimal codons

| Species           | Amino acid | Codon | high-expression gene ( <i>atp6</i> ) |      | low-expression gene ( <i>nad6</i> ) |      | $\Delta$ RSCU |
|-------------------|------------|-------|--------------------------------------|------|-------------------------------------|------|---------------|
|                   |            |       | Number                               | RSCU | Number                              | RSCU |               |
| <i>P. liuorum</i> | Phe        | UUU   | 6                                    | 0.86 | 9                                   | 1.8  | -0.94         |
|                   |            | UUC*  | 8                                    | 1.14 | 1                                   | 0.2  | 0.94          |
|                   | Leu        | UUA   | 10                                   | 1.18 | 12                                  | 2.48 | -1.3          |
|                   |            | UUG   | 1                                    | 0.12 | 12                                  | 2.48 | -2.36         |
|                   |            | CUU*  | 9                                    | 1.06 | 4                                   | 0.83 | 0.23          |
|                   |            | CUC*  | 9                                    | 1.06 | 0                                   | 0    | 1.06          |
|                   |            | CUA*  | 15                                   | 1.76 | 1                                   | 0.21 | 1.55          |
|                   |            | CUG   | 7                                    | 0.82 | 0                                   | 0    | 0.82          |
|                   | Ile        | AUU   | 13                                   | 1.56 | 5                                   | 1.88 | -0.32         |
|                   |            | AUC   | 7                                    | 0.84 | 0                                   | 0    | 0.84          |
|                   |            | AUA   | 5                                    | 0.6  | 3                                   | 1.13 | -0.53         |
|                   | Met        | AUG   | 2                                    | 1    | 5                                   | 1    | 0             |
|                   | Val        | GUU   | 6                                    | 1.6  | 11                                  | 1.83 | -0.23         |
|                   |            | GUC   | 2                                    | 0.53 | 0                                   | 0    | 0.53          |
|                   |            | GUA   | 7                                    | 1.87 | 6                                   | 1    | 0.87          |
|                   |            | GUG   | 0                                    | 0    | 7                                   | 1.17 | -1.17         |
|                   | Ser        | UCU   | 0                                    | 0    | 6                                   | 3.27 | -3.27         |
|                   |            | UCC*  | 2                                    | 1.2  | 0                                   | 0    | 1.2           |
|                   |            | UCA*  | 2                                    | 1.2  | 1                                   | 0.55 | 0.65          |
|                   |            | UCG   | 0                                    | 0    | 1                                   | 0.55 | -0.55         |
|                   | Pro        | CCU*  | 5                                    | 1.18 | 1                                   | 0.67 | 0.51          |
|                   |            | CCC   | 4                                    | 0.94 | 1                                   | 0.67 | 0.27          |
|                   |            | CCA   | 7                                    | 1.65 | 2                                   | 1.33 | 0.32          |
|                   |            | CCG   | 1                                    | 0.24 | 2                                   | 1.33 | -1.09         |
|                   | Thr        | ACU   | 5                                    | 1.05 | 2                                   | 2.67 | -1.62         |
|                   |            | ACC   | 4                                    | 0.84 | 0                                   | 0    | 0.84          |
|                   |            | ACA*  | 10                                   | 2.11 | 0                                   | 0    | 2.11          |
|                   |            | ACG   | 0                                    | 0    | 1                                   | 1.33 | -1.33         |
|                   | Ala        | GCU   | 5                                    | 1.11 | 12                                  | 2.67 | -1.56         |
|                   |            | GCC*  | 6                                    | 1.33 | 0                                   | 0    | 1.33          |
|                   |            | GCA*  | 6                                    | 1.33 | 2                                   | 0.44 | 0.89          |
|                   |            | GCG   | 1                                    | 0.22 | 4                                   | 0.89 | -0.67         |
|                   | Tyr        | UAU   | 2                                    | 0.8  | 9                                   | 2    | -1.2          |
|                   |            | UAC*  | 3                                    | 1.2  | 0                                   | 0    | 1.2           |
|                   | TER        | UAA   | 1                                    | 0.5  | 0                                   | 0    | 0.5           |
|                   |            | UAG   | 0                                    | 0    | 1                                   | 1    | -1            |
|                   | His        | CAU   | 1                                    | 0.5  | 0                                   | 0    | 0.5           |
|                   |            | CAC*  | 3                                    | 1.5  | 0                                   | 0    | 1.5           |
|                   | Gln        | CAA*  | 6                                    | 1.5  | 0                                   | 0    | 1.5           |
|                   |            | CAG   | 2                                    | 0.5  | 0                                   | 0    | 0.5           |
|                   | Asn        | AAU   | 4                                    | 0.8  | 0                                   | 0    | 0.8           |
|                   |            | AAC   | 6                                    | 1.2  | 2                                   | 2    | -0.8          |
|                   | Lys        | AAA*  | 4                                    | 2    | 0                                   | 0    | 2             |
|                   |            | AAG   | 0                                    | 0    | 0                                   | 0    | 0             |
|                   | Asp        | GAU   | 0                                    | 0    | 3                                   | 2    | -2            |
|                   |            | GAC   | 0                                    | 0    | 0                                   | 0    | 0             |
|                   | Glu        | GAA*  | 6                                    | 1.71 | 0                                   | 0    | 1.71          |
|                   |            | GAG   | 1                                    | 0.29 | 5                                   | 2    | -1.71         |
|                   | Cys        | UGU   | 1                                    | 2    | 3                                   | 2    | 0             |
|                   |            | UGC   | 0                                    | 0    | 0                                   | 0    | 0             |
|                   | TER        | UGA   | 5                                    | 2.5  | 2                                   | 2    | 0.5           |
|                   | Trp        | UGG   | 0                                    | 0    | 3                                   | 1    | -1            |
|                   | Arg        | CGU   | 1                                    | 1.2  | 0                                   | 0    | 1.2           |
|                   |            | CGC*  | 1                                    | 1.2  | 0                                   | 0    | 1.2           |
|                   |            | CGA   | 2                                    | 2.4  | 3                                   | 4.5  | -2.1          |
|                   |            | CGG   | 1                                    | 1.2  | 1                                   | 1.5  | -0.3          |
|                   | Ser        | AGU   | 4                                    | 2.4  | 3                                   | 1.64 | 0.76          |
|                   |            | AGC   | 2                                    | 1.2  | 0                                   | 0    | 1.2           |
|                   | Arg        | AGA   | 0                                    | 0    | 0                                   | 0    | 0             |
|                   |            | AGG   | 0                                    | 0    | 0                                   | 0    | 0             |
|                   | Gly        | GGU   | 1                                    | 0.57 | 6                                   | 1    | -0.43         |
|                   |            | GGC*  | 4                                    | 2.29 | 1                                   | 0.17 | 2.12          |
|                   |            | GGA   | 2                                    | 1.14 | 7                                   | 1.17 | -0.03         |
|                   |            | GGG   | 0                                    | 0    | 10                                  | 1.67 | -1.67         |

\*Indicated the optimal codons

| Species             | Amino acid | Codon | high-expression gene ( <i>nad4l</i> ) |      | low-expression gene ( <i>nad6</i> ) |      | $\Delta$ RSCU |
|---------------------|------------|-------|---------------------------------------|------|-------------------------------------|------|---------------|
|                     |            |       | Number                                | RSCU | Number                              | RSCU |               |
| <i>P. argenteus</i> | Phe        | UUU   | 2                                     | 0.57 | 12                                  | 2    | -1.43         |
|                     |            | UUC*  | 5                                     | 1.43 | 0                                   | 0    | 1.43          |
|                     | Leu        | UUA   | 1                                     | 0.26 | 17                                  | 3.52 | -3.26         |
|                     |            | UUG   | 0                                     | 0    | 7                                   | 1.45 | -1.45         |
|                     |            | CUU*  | 7                                     | 1.83 | 3                                   | 0.62 | 1.21          |
|                     |            | CUC   | 2                                     | 0.52 | 1                                   | 0.21 | 0.31          |
|                     |            | CUA*  | 12                                    | 3.13 | 1                                   | 0.21 | 2.92          |
|                     | Ile        | CUG   | 1                                     | 0.26 | 0                                   | 0    | 0.26          |
|                     |            | AUU   | 3                                     | 1.13 | 7                                   | 1.91 | -0.78         |
|                     |            | AUC   | 0                                     | 0    | 0                                   | 0    | 0             |
|                     |            | AUA   | 5                                     | 1.88 | 4                                   | 1.09 | 0.79          |
|                     | Met        | AUG   | 1                                     | 1    | 4                                   | 1    | 0             |
|                     | Val        | GUU   | 0                                     | 0    | 11                                  | 1.83 | -1.83         |
|                     |            | GUC   | 0                                     | 0    | 1                                   | 0.17 | -0.17         |
|                     |            | GUA   | 1                                     | 4    | 9                                   | 1.5  | 2.5           |
|                     |            | GUG   | 0                                     | 0    | 3                                   | 0.5  | -0.5          |
|                     | Ser        | UCU   | 2                                     | 1.09 | 5                                   | 2.5  | -1.41         |
|                     |            | UCC   | 1                                     | 0.55 | 1                                   | 0.5  | 0.05          |
|                     |            | UCA*  | 6                                     | 3.27 | 1                                   | 0.5  | 2.77          |
|                     |            | UCG   | 1                                     | 0.55 | 2                                   | 1    | -0.45         |
|                     | Pro        | CCU   | 1                                     | 2    | 2                                   | 1.33 | 0.67          |
|                     |            | CCC   | 0                                     | 0    | 0                                   | 0    | 0             |
|                     |            | CCA*  | 1                                     | 2    | 1                                   | 0.67 | 1.33          |
|                     |            | CCG   | 0                                     | 0    | 3                                   | 2    | -2            |
|                     | Thr        | ACU   | 1                                     | 0.8  | 2                                   | 4    | -3.2          |
|                     |            | ACC*  | 4                                     | 3.2  | 0                                   | 0    | 3.2           |
|                     |            | ACA   | 0                                     | 0    | 0                                   | 0    | 0             |
|                     |            | ACG   | 0                                     | 0    | 0                                   | 0    | 0             |
|                     | Ala        | GCU   | 3                                     | 0.92 | 8                                   | 1.88 | -0.96         |
|                     |            | GCC*  | 5                                     | 1.54 | 1                                   | 0.24 | 1.3           |
|                     |            | GCA   | 5                                     | 1.54 | 5                                   | 1.18 | 0.36          |
|                     |            | GCG   | 0                                     | 0    | 3                                   | 0.71 | -0.71         |
|                     | Tyr        | UAU   | 0                                     | 0    | 10                                  | 1.82 | -1.82         |
|                     |            | UAC   | 0                                     | 0    | 1                                   | 0.18 | -0.18         |
|                     | TER        | UAA   | 1                                     | 1.5  | 1                                   | 0.75 | 0.75          |
|                     |            | UAG   | 0                                     | 0    | 0                                   | 0    | 0             |
|                     | His        | CAU   | 2                                     | 1.33 | 1                                   | 2    | -0.67         |
|                     |            | CAC   | 1                                     | 0.67 | 0                                   | 0    | 0.67          |
|                     | Gln        | CAA   | 2                                     | 1.33 | 2                                   | 1.33 | 0             |
|                     |            | CAG   | 1                                     | 0.67 | 1                                   | 0.67 | 0             |
|                     | Asn        | AAU   | 3                                     | 0.86 | 4                                   | 2    | -1.14         |
|                     |            | AAC*  | 4                                     | 1.14 | 0                                   | 0    | 1.14          |
|                     | Lys        | AAA   | 0                                     | 0    | 0                                   | 0    | 0             |
|                     |            | AAG   | 0                                     | 0    | 1                                   | 2    | -2            |
|                     | Asp        | GAU   | 0                                     | 0    | 1                                   | 1    | -1            |
|                     |            | GAC   | 1                                     | 2    | 1                                   | 1    | 1             |
|                     | Glu        | GAA*  | 1                                     | 1    | 1                                   | 0.4  | 0.6           |
|                     |            | GAG   | 1                                     | 1    | 4                                   | 1.6  | -0.6          |
|                     | Cys        | UGU   | 1                                     | 0.67 | 1                                   | 2    | -1.33         |
|                     |            | UGC*  | 2                                     | 1.33 | 0                                   | 0    | 1.33          |
|                     | TER        | UGA   | 1                                     | 1.5  | 3                                   | 2.25 | -0.75         |
|                     | Trp        | UGG   | 0                                     | 0    | 1                                   | 1    | -1            |
|                     | Arg        | CGU   | 0                                     | 0    | 0                                   | 0    | 0             |
|                     |            | CGC   | 1                                     | 2    | 0                                   | 0    | 2             |
|                     |            | CGA   | 2                                     | 4    | 1                                   | 1.2  | 2.8           |
|                     |            | CGG   | 0                                     | 0    | 4                                   | 4.8  | -4.8          |
|                     | Ser        | AGU   | 0                                     | 0    | 3                                   | 1.5  | -1.5          |
|                     |            | AGC   | 1                                     | 0.55 | 0                                   | 0    | 0.55          |
|                     | Arg        | AGA   | 0                                     | 0    | 0                                   | 0    | 0             |
|                     |            | AGG   | 0                                     | 0    | 0                                   | 0    | 0             |
|                     | Gly        | GGU   | 1                                     | 1    | 7                                   | 1.47 | -0.47         |
|                     |            | GGC*  | 2                                     | 2    | 1                                   | 0.21 | 1.79          |
|                     |            | GGA   | 1                                     | 1    | 5                                   | 1.05 | -0.05         |
|                     |            | GGG   | 0                                     | 0    | 6                                   | 1.26 | -1.26         |

\*Indicated the optimal codons

| Species         | Amino acid | Codon | high-expression gene ( <i>atp6</i> ) |      | low-expression gene ( <i>nad6</i> ) |      | $\Delta$ RSCU |
|-----------------|------------|-------|--------------------------------------|------|-------------------------------------|------|---------------|
|                 |            |       | Number                               | RSCU | Number                              | RSCU |               |
| <i>P. minor</i> | Phe        | UUU   | 10                                   | 1.18 | 11                                  | 1.83 | -0.65         |
|                 |            | UUC   | 7                                    | 0.82 | 1                                   | 0.17 | 0.65          |
|                 | Leu        | UUA   | 17                                   | 2.17 | 12                                  | 2.67 | -0.5          |
|                 |            | UUG   | 0                                    | 0    | 12                                  | 2.67 | -2.67         |
|                 |            | CUU*  | 13                                   | 1.66 | 1                                   | 0.22 | 1.44          |
|                 |            | CUC   | 1                                    | 0.13 | 0                                   | 0    | 0.13          |
|                 |            | CUA*  | 12                                   | 1.53 | 2                                   | 0.44 | 1.09          |
|                 | Ile        | CUG   | 4                                    | 0.51 | 0                                   | 0    | 0.51          |
|                 |            | AUU   | 19                                   | 1.73 | 6                                   | 1.29 | 0.44          |
|                 |            | AUC   | 4                                    | 0.36 | 0                                   | 0    | 0.36          |
|                 |            | AUA   | 10                                   | 0.91 | 8                                   | 1.71 | -0.8          |
|                 | Met        | AUG   | 1                                    | 1    | 2                                   | 1    | 0             |
|                 | Val        | GUU   | 2                                    | 0.73 | 9                                   | 1.5  | -0.77         |
|                 |            | GUC   | 2                                    | 0.73 | 0                                   | 0    | 0.73          |
|                 |            | GUA   | 6                                    | 2.18 | 10                                  | 1.67 | 0.51          |
|                 | Ser        | GUG   | 1                                    | 0.36 | 5                                   | 0.83 | -0.47         |
|                 |            | UCU   | 2                                    | 1.33 | 5                                   | 2.5  | -1.17         |
|                 |            | UCC*  | 2                                    | 1.33 | 0                                   | 0    | 1.33          |
|                 |            | UCA   | 2                                    | 1.33 | 2                                   | 1    | 0.33          |
|                 |            | UCG   | 0                                    | 0    | 1                                   | 0.5  | -0.5          |
|                 | Pro        | CCU   | 5                                    | 1.25 | 5                                   | 3.33 | -2.08         |
|                 |            | CCC   | 3                                    | 0.75 | 0                                   | 0    | 0.75          |
|                 |            | CCA*  | 8                                    | 2    | 0                                   | 0    | 2             |
|                 |            | CCG   | 0                                    | 0    | 1                                   | 0.67 | -0.67         |
|                 | Thr        | ACU   | 7                                    | 1.27 | 3                                   | 4    | -2.73         |
|                 |            | ACC*  | 6                                    | 1.09 | 0                                   | 0    | 1.09          |
|                 |            | ACA*  | 9                                    | 1.64 | 0                                   | 0    | 1.64          |
|                 |            | ACG   | 0                                    | 0    | 0                                   | 0    | 0             |
|                 | Ala        | GCU   | 4                                    | 1    | 11                                  | 2.59 | -1.59         |
|                 |            | GCC   | 2                                    | 0.5  | 0                                   | 0    | 0.5           |
|                 |            | GCA*  | 10                                   | 2.5  | 2                                   | 0.47 | 2.03          |
|                 |            | GCG   | 0                                    | 0    | 4                                   | 0.94 | -0.94         |
|                 | Tyr        | UAU   | 4                                    | 1.6  | 9                                   | 1.64 | -0.04         |
|                 |            | UAC   | 1                                    | 0.4  | 2                                   | 0.36 | 0.04          |
|                 | TER        | UAA   | 1                                    | 0.75 | 0                                   | 0    | 0.75          |
|                 |            | UAG   | 0                                    | 0    | 1                                   | 1    | -1            |
|                 | His        | CAU*  | 4                                    | 2    | 0                                   | 0    | 2             |
|                 |            | CAC   | 0                                    | 0    | 0                                   | 0    | 0             |
|                 | Gln        | CAA*  | 6                                    | 1.5  | 0                                   | 0    | 1.5           |
|                 |            | CAG   | 2                                    | 0.5  | 0                                   | 0    | 0.5           |
|                 | Asn        | AAU   | 5                                    | 1.11 | 2                                   | 2    | -0.89         |
|                 |            | AAC   | 4                                    | 0.89 | 0                                   | 0    | 0.89          |
|                 | Lys        | AAA*  | 7                                    | 2    | 0                                   | 0    | 2             |
|                 |            | AAG   | 0                                    | 0    | 0                                   | 0    | 0             |
|                 | Asp        | GAU   | 0                                    | 0    | 4                                   | 2    | -2            |
|                 |            | GAC   | 1                                    | 2    | 0                                   | 0    | 2             |
|                 | Glu        | GAA*  | 4                                    | 1.33 | 2                                   | 0.67 | 0.66          |
|                 |            | GAG   | 2                                    | 0.67 | 4                                   | 1.33 | -0.66         |
|                 | Cys        | UGU   | 0                                    | 0    | 2                                   | 2    | -2            |
|                 |            | UGC   | 0                                    | 0    | 0                                   | 0    | 0             |
|                 | TER        | UGA   | 3                                    | 2.25 | 2                                   | 2    | 0.25          |
|                 | Trp        | UGG   | 1                                    | 1    | 1                                   | 1    | 0             |
|                 | Arg        | CGU   | 1                                    | 1.5  | 0                                   | 0    | 1.5           |
|                 |            | CGC   | 1                                    | 1.5  | 0                                   | 0    | 1.5           |
|                 |            | CGA   | 2                                    | 3    | 2                                   | 3    | 0             |
|                 |            | CGG   | 0                                    | 0    | 2                                   | 3    | -3            |
|                 |            | AGU   | 2                                    | 1.33 | 4                                   | 2    | -0.67         |
|                 | Ser        | AGC   | 1                                    | 0.67 | 0                                   | 0    | 0.67          |
|                 |            | AGA   | 0                                    | 0    | 0                                   | 0    | 0             |
|                 | Arg        | AGG   | 0                                    | 0    | 0                                   | 0    | 0             |
|                 |            | GGU   | 3                                    | 1.71 | 8                                   | 1.33 | 0.38          |
|                 | Gly        | GGC   | 3                                    | 1.71 | 1                                   | 0.17 | 1.54          |
|                 |            | GGA   | 1                                    | 0.57 | 5                                   | 0.83 | -0.26         |
|                 |            | GGG   | 0                                    | 0    | 10                                  | 1.67 | -1.67         |

\*Indicated the optimal codons

| Species             | Amino acid | Codon | high-expression gene ( <i>atp6</i> ) |      | low-expression gene ( <i>nad6</i> ) |      | $\Delta$ RSCU |
|---------------------|------------|-------|--------------------------------------|------|-------------------------------------|------|---------------|
|                     |            |       | Number                               | RSCU | Number                              | RSCU |               |
| <i>P. chinensis</i> | Phe        | UUU   | 6                                    | 1    | 11                                  | 2    | -1            |
|                     |            | UUC*  | 6                                    | 1    | 0                                   | 0    | 1             |
|                     | Leu        | UUA   | 11                                   | 1.43 | 11                                  | 2.36 | -0.93         |
|                     |            | UUG   | 3                                    | 0.39 | 12                                  | 2.57 | -2.18         |
|                     |            | CUU   | 7                                    | 0.91 | 4                                   | 0.86 | 0.05          |
|                     |            | CUC   | 5                                    | 0.65 | 0                                   | 0    | 0.65          |
|                     |            | CUA*  | 16                                   | 2.09 | 1                                   | 0.21 | 1.88          |
|                     |            | CUG   | 4                                    | 0.52 | 0                                   | 0    | 0.52          |
|                     | Ile        | AUU   | 13                                   | 1.7  | 4                                   | 2.4  | -0.7          |
|                     |            | AUC   | 5                                    | 0.65 | 0                                   | 0    | 0.65          |
|                     |            | AUA   | 5                                    | 0.65 | 1                                   | 0.6  | 0.05          |
|                     | Met        | AUG   | 0                                    | 0    | 7                                   | 1    | -1            |
|                     | Val        | GUU   | 7                                    | 1.87 | 12                                  | 1.85 | 0.02          |
|                     |            | GUC   | 2                                    | 0.53 | 0                                   | 0    | 0.53          |
|                     |            | GUA*  | 4                                    | 1.07 | 5                                   | 0.77 | 0.3           |
|                     | Ser        | GUG   | 2                                    | 0.53 | 9                                   | 1.38 | -0.85         |
|                     |            | UCU   | 0                                    | 0    | 4                                   | 2    | -2            |
|                     |            | UCC*  | 1                                    | 1.2  | 0                                   | 0    | 1.2           |
|                     |            | UCA*  | 2                                    | 2.4  | 1                                   | 0.5  | 1.9           |
|                     |            | UCG   | 0                                    | 0    | 3                                   | 1.5  | -1.5          |
|                     | Pro        | CCU   | 3                                    | 0.8  | 1                                   | 0.67 | 0.13          |
|                     |            | CCC*  | 5                                    | 1.33 | 1                                   | 0.67 | 0.66          |
|                     |            | CCA   | 7                                    | 1.87 | 2                                   | 1.33 | 0.54          |
|                     |            | CCG   | 0                                    | 0    | 2                                   | 1.33 | -1.33         |
|                     | Thr        | ACU   | 4                                    | 0.76 | 2                                   | 4    | -3.24         |
|                     |            | ACC*  | 7                                    | 1.33 | 0                                   | 0    | 1.33          |
|                     |            | ACA*  | 10                                   | 1.9  | 0                                   | 0    | 1.9           |
|                     | Ala        | ACG   | 0                                    | 0    | 0                                   | 0    | 0             |
|                     |            | GCU   | 5                                    | 1.05 | 11                                  | 2.44 | -1.39         |
|                     |            | GCC*  | 7                                    | 1.47 | 2                                   | 0.44 | 1.03          |
|                     |            | GCA*  | 5                                    | 1.05 | 3                                   | 0.67 | 0.38          |
|                     |            | GCG   | 2                                    | 0.42 | 2                                   | 0.44 | -0.02         |
|                     | Tyr        | UAU   | 3                                    | 1.5  | 7                                   | 2    | -0.5          |
|                     |            | UAC   | 1                                    | 0.5  | 0                                   | 0    | 0.5           |
|                     | TER        | UAA   | 1                                    | 0.5  | 1                                   | 1    | -0.5          |
|                     |            | UAG   | 0                                    | 0    | 0                                   | 0    | 0             |
|                     | His        | CAU   | 3                                    | 1.5  | 2                                   | 2    | -0.5          |
|                     |            | CAC   | 1                                    | 0.5  | 0                                   | 0    | 0.5           |
|                     | Gln        | CAA*  | 8                                    | 2    | 0                                   | 0    | 2             |
|                     |            | CAG   | 0                                    | 0    | 0                                   | 0    | 0             |
|                     | Asn        | AAU   | 4                                    | 1.14 | 0                                   | 0    | 1.14          |
|                     |            | AAC   | 3                                    | 0.86 | 1                                   | 2    | -1.14         |
|                     | Lys        | AAA*  | 4                                    | 1.6  | 0                                   | 0    | 1.6           |
|                     |            | AAG   | 1                                    | 0.4  | 0                                   | 0    | 0.4           |
|                     | Asp        | GAU   | 1                                    | 2    | 3                                   | 2    | 0             |
|                     |            | GAC   | 0                                    | 0    | 0                                   | 0    | 0             |
|                     | Glu        | GAA*  | 6                                    | 2    | 1                                   | 0.4  | 1.6           |
|                     |            | GAG   | 0                                    | 0    | 4                                   | 1.6  | -1.6          |
|                     | Cys        | UGU   | 0                                    | 0    | 3                                   | 2    | -2            |
|                     |            | UGC   | 0                                    | 0    | 0                                   | 0    | 0             |
|                     | TER        | UGA   | 5                                    | 2.5  | 2                                   | 2    | 0.5           |
|                     | Trp        | UGG   | 0                                    | 0    | 3                                   | 1    | -1            |
|                     | Arg        | CGU   | 1                                    | 1.5  | 0                                   | 0    | 1.5           |
|                     |            | CGC   | 1                                    | 1.5  | 0                                   | 0    | 1.5           |
|                     |            | CGA   | 2                                    | 3    | 3                                   | 4.5  | -1.5          |
|                     |            | CGG   | 0                                    | 0    | 1                                   | 1.5  | -1.5          |
|                     | Ser        | AGU   | 1                                    | 1.2  | 4                                   | 2    | -0.8          |
|                     |            | AGC   | 1                                    | 1.2  | 0                                   | 0    | 1.2           |
|                     | Arg        | AGA   | 0                                    | 0    | 0                                   | 0    | 0             |
|                     |            | AGG   | 0                                    | 0    | 0                                   | 0    | 0             |
|                     | Gly        | GGU   | 1                                    | 0.57 | 7                                   | 1.17 | -0.6          |
|                     |            | GGC*  | 4                                    | 2.29 | 0                                   | 0    | 2.29          |
|                     |            | GGA*  | 2                                    | 1.14 | 4                                   | 0.67 | 0.47          |
|                     |            | GGG   | 0                                    | 0    | 13                                  | 2.17 | -2.17         |

\*Indicated the optimal codons.
