# Supplementary material for: Comparative Analysis of the Systematics and Evolution of the Pampus Genus of Fish (Perciformes: Stromateidae) Based on Osteology, Population Genetics and Complete Mitogenomes
Source: MDPI journal article supplement (doi:10.3390/ani14050814), 2024-03-06
Supplement: s1 [file s1]

Table S1. Summary of complete mitochondrial gene/element features of *P. argenteus*, *P. punctatissimus*, *P. cinereus*, *P. chinensis*, *P. echinogaster*, *P. minor* and *P. liuorum*

| Species             | Gene/element         | Strand | Position |       | Size (bp) | Inferred start codon | Inferred stop codon | Anti-codon | Intergenic nucleotide* (bp) |
|---------------------|----------------------|--------|----------|-------|-----------|----------------------|---------------------|------------|-----------------------------|
|                     |                      |        | From     | To    |           |                      |                     |            |                             |
| <i>P. argenteus</i> | <i>trnF</i>          | +      | 1        | 69    | 69        | –                    | –                   | GAA        | 0                           |
|                     | <i>rrnS</i>          | +      | 70       | 1023  | 954       | –                    | –                   | –          | 0                           |
|                     | <i>trnV</i>          | +      | 1024     | 1096  | 73        | –                    | –                   | TAC        | 26                          |
|                     | <i>rrnL</i>          | +      | 1123     | 2774  | 1652      | –                    | –                   | –          | 10                          |
|                     | <i>trnL2</i>         | +      | 2785     | 2858  | 74        | –                    | –                   | TAA        | 0                           |
|                     | <i>nad1</i>          | +      | 2859     | 3833  | 975       | ATG                  | TAA                 | –          | 4                           |
|                     | <i>trnI</i>          | +      | 3838     | 3908  | 71        | –                    | –                   | GAT        | -1                          |
|                     | <i>trnQ</i>          | -      | 3908     | 3978  | 71        | –                    | –                   | TTG        | -1                          |
|                     | <i>trnM</i>          | +      | 3978     | 4051  | 74        | –                    | –                   | CAT        | 23                          |
|                     | <i>trnM</i>          | +      | 4075     | 4147  | 73        | –                    | –                   | CAT        | 0                           |
|                     | <i>nad2</i>          | +      | 4148     | 5194  | 1047      | ATG                  | TAA                 | –          | -1                          |
|                     | <i>trnW</i>          | +      | 5194     | 5264  | 71        | –                    | –                   | TCA        | 2                           |
|                     | <i>trnA</i>          | -      | 5267     | 5335  | 69        | –                    | –                   | TGC        | 1                           |
|                     | <i>trnN</i>          | -      | 5337     | 5409  | 73        | –                    | –                   | GTT        | 4                           |
|                     | <i>O<sub>L</sub></i> | +      | 5414     | 5445  | 32        | –                    | –                   | –          | -1                          |
|                     | <i>trnC</i>          | -      | 5445     | 5510  | 66        | –                    | –                   | GCA        | 0                           |
|                     | <i>trnY</i>          | -      | 5511     | 5577  | 67        | –                    | –                   | GTA        | 1                           |
|                     | <i>cox1</i>          | +      | 5579     | 7132  | 1554      | GTG                  | AGA                 | –          | -5                          |
|                     | <i>trnS2</i>         | -      | 7128     | 7198  | 71        | –                    | –                   | TGA        | 3                           |
|                     | <i>trnD</i>          | +      | 7202     | 7271  | 70        | –                    | –                   | GTC        | 8                           |
|                     | <i>cox2</i>          | +      | 7280     | 7970  | 691       | ATG                  | T                   | –          | 0                           |
|                     | <i>trnK</i>          | +      | 7971     | 8045  | 75        | –                    | –                   | TTT        | 7                           |
|                     | <i>atp8</i>          | +      | 8053     | 8220  | 168       | ATG                  | TAA                 | –          | -10                         |
|                     | <i>atp6</i>          | +      | 8211     | 8894  | 684       | ATG                  | TAA                 | –          | -1                          |
|                     | <i>cox3</i>          | +      | 8894     | 9679  | 786       | ATG                  | TAA                 | –          | -1                          |
|                     | <i>trnG</i>          | +      | 9679     | 9750  | 72        | –                    | –                   | TCC        | 0                           |
|                     | <i>nad3</i>          | +      | 9751     | 10101 | 351       | ATG                  | TAG                 | –          | -2                          |
|                     | <i>trnR</i>          | +      | 10100    | 10169 | 70        | –                    | –                   | TCG        | 0                           |
|                     | <i>nad4l</i>         | +      | 10170    | 10466 | 297       | ATG                  | TAA                 | –          | 20                          |
|                     | <i>nad4</i>          | +      | 10487    | 11840 | 1354      | ATG                  | T                   | –          | 0                           |
|                     | <i>trnH</i>          | +      | 11841    | 11909 | 69        | –                    | –                   | GTG        | 0                           |
|                     | <i>trnS1</i>         | +      | 11910    | 11978 | 69        | –                    | –                   | GCT        | 5                           |
|                     | <i>trnL1</i>         | +      | 11984    | 12056 | 73        | –                    | –                   | TAG        | 0                           |
|                     | <i>nad5</i>          | +      | 12057    | 13895 | 1839      | ATG                  | TAG                 | –          | -4                          |
|                     | <i>nad6</i>          | -      | 13892    | 14413 | 522       | GTG                  | TAA                 | –          | 0                           |
|                     | <i>trnE</i>          | -      | 14414    | 14482 | 69        | –                    | –                   | TTC        | 5                           |
|                     | <i>cob</i>           | +      | 14488    | 15624 | 1137      | ATG                  | TAA                 | –          | 4                           |
|                     | <i>trnT</i>          | +      | 15629    | 15700 | 72        | –                    | –                   | TGT        | -1                          |
|                     | <i>trnP</i>          | -      | 15700    | 15770 | 71        | –                    | –                   | TGG        | 258                         |
|                     | <i>OH</i>            | +      | 16029    | 16550 | 522       | –                    | –                   | –          | 548                         |

\*Intergenic nucleotide: non-coding bases between the features, with a negative number indicating an overlap; – means not applicable.

| Species                  | Gene/element | Strand | Position |       | Size<br>(bp) | Inferred<br>start<br>codon | Inferred<br>stop<br>codon | Anti-<br>codon | Intergenic<br>nucleotide*<br>(bp) |
|--------------------------|--------------|--------|----------|-------|--------------|----------------------------|---------------------------|----------------|-----------------------------------|
|                          |              |        | From     | To    |              |                            |                           |                |                                   |
| <i>P. punctatissimus</i> | <i>trnF</i>  | +      | 1        | 69    | 69           | –                          | –                         | GAA            | 0                                 |
|                          | <i>rrnS</i>  | +      | 70       | 1022  | 953          | –                          | –                         | –              | 1                                 |
|                          | <i>trnV</i>  | +      | 1024     | 1096  | 73           | –                          | –                         | TAC            | 25                                |
|                          | <i>rrnL</i>  | +      | 1122     | 2788  | 1667         | –                          | –                         | –              | 0                                 |
|                          | <i>trnL2</i> | +      | 2789     | 2862  | 74           | –                          | –                         | TAA            | 0                                 |
|                          | <i>nad1</i>  | +      | 2863     | 3837  | 975          | ATG                        | TAA                       | –              | 4                                 |
|                          | <i>trnI</i>  | +      | 3842     | 3912  | 71           | –                          | –                         | GAT            | -1                                |
|                          | <i>trnQ</i>  | -      | 3912     | 3982  | 71           | –                          | –                         | TTG            | -1                                |
|                          | <i>trnM</i>  | +      | 3982     | 4055  | 74           | –                          | –                         | CAT            | 0                                 |
|                          | <i>nad2</i>  | +      | 4056     | 5102  | 1047         | ATG                        | TAA                       | –              | -1                                |
|                          | <i>trnW</i>  | +      | 5102     | 5172  | 71           | –                          | –                         | TCA            | 1                                 |
|                          | <i>trnA</i>  | -      | 5174     | 5242  | 69           | –                          | –                         | TGC            | 1                                 |
|                          | <i>trnN</i>  | -      | 5244     | 5316  | 73           | –                          | –                         | GTT            | 3                                 |
|                          | <i>OL</i>    | +      | 5320     | 5351  | 32           | –                          | –                         | –              | -1                                |
|                          | <i>trnC</i>  | -      | 5351     | 5416  | 66           | –                          | –                         | GCA            | 0                                 |
|                          | <i>trnY</i>  | -      | 5417     | 5483  | 67           | –                          | –                         | GTA            | 1                                 |
|                          | <i>cox1</i>  | +      | 5485     | 7035  | 1551         | GTG                        | TAA                       | –              | 0                                 |
|                          | <i>trnS2</i> | -      | 7036     | 7106  | 71           | –                          | –                         | TGA            | 3                                 |
|                          | <i>trnD</i>  | +      | 7110     | 7182  | 73           | –                          | –                         | GTC            | 8                                 |
|                          | <i>cox2</i>  | +      | 7191     | 7881  | 691          | ATG                        | T                         | –              | 0                                 |
|                          | <i>trnK</i>  | +      | 7882     | 7956  | 75           | –                          | –                         | TTT            | 28                                |
|                          | <i>atp8</i>  | +      | 7985     | 8152  | 168          | ATG                        | TAA                       | –              | -16                               |
|                          | <i>atp6</i>  | +      | 8137     | 8826  | 690          | CTG                        | TAA                       | –              | -1                                |
|                          | <i>cox3</i>  | +      | 8826     | 9611  | 786          | ATG                        | TAA                       | –              | -1                                |
|                          | <i>trnG</i>  | +      | 9611     | 9682  | 72           | –                          | –                         | TCC            | 0                                 |
|                          | <i>nad3</i>  | +      | 9683     | 10031 | 349          | ATG                        | T                         | –              | 0                                 |
|                          | <i>trnR</i>  | +      | 10032    | 10101 | 70           | –                          | –                         | TCG            | 0                                 |
|                          | <i>nad4l</i> | +      | 10102    | 10398 | 297          | ATG                        | TAA                       | –              | -7                                |
|                          | <i>nad4</i>  | +      | 10392    | 11772 | 1381         | GTG                        | T                         | –              | 0                                 |
|                          | <i>trnH</i>  | +      | 11773    | 11842 | 70           | –                          | –                         | GTG            | 0                                 |
|                          | <i>trnS1</i> | +      | 11843    | 11911 | 69           | –                          | –                         | GCT            | 5                                 |
|                          | <i>trnL1</i> | +      | 11917    | 11989 | 73           | –                          | –                         | TAG            | 0                                 |
|                          | <i>nad5</i>  | +      | 11990    | 13828 | 1839         | ATG                        | TAA                       | –              | -4                                |
|                          | <i>nad6</i>  | -      | 13825    | 14334 | 510          | ATG                        | TAA                       | –              | -39                               |
|                          | <i>OH</i>    | +      | 14296    | 14340 | 45           | –                          | –                         | –              | 6                                 |
|                          | <i>trnE</i>  | -      | 14347    | 14415 | 69           | –                          | –                         | TTC            | 5                                 |
|                          | <i>cob</i>   | +      | 14421    | 15557 | 1137         | ATG                        | TAA                       | –              | 4                                 |
|                          | <i>trnT</i>  | +      | 15562    | 15633 | 72           | –                          | –                         | TGT            | -1                                |
|                          | <i>trnP</i>  | -      | 15633    | 15702 | 70           | –                          | –                         | TGG            | 277                               |
|                          | <i>OH</i>    | +      | 15980    | 16498 | 519          | –                          | –                         | –              | 56                                |

\*Intergenic nucleotide: non-coding bases between the features, with a negative number indicating an overlap; – means not applicable.

| Species            | Gene/element         | Strand | Position |       | Size<br>(bp) | Inferred<br>start<br>codon | Inferred<br>stop<br>codon | Anti-<br>codon | Intergenic<br>nucleotide*<br>(bp) |
|--------------------|----------------------|--------|----------|-------|--------------|----------------------------|---------------------------|----------------|-----------------------------------|
|                    |                      |        | From     | To    |              |                            |                           |                |                                   |
| <i>P. cinereus</i> | <i>trnF</i>          | +      | 1        | 69    | 69           | –                          | –                         | GAA            | 0                                 |
|                    | <i>rrnS</i>          | +      | 70       | 1023  | 954          | –                          | –                         | –              | 1                                 |
|                    | <i>trnV</i>          | +      | 1025     | 1097  | 73           | –                          | –                         | TAC            | 26                                |
|                    | <i>rrnL</i>          | +      | 1124     | 2792  | 1669         | –                          | –                         | –              | 0                                 |
|                    | <i>trnL2</i>         | +      | 2793     | 2866  | 74           | –                          | –                         | TAA            | 0                                 |
|                    | <i>nad1</i>          | +      | 2867     | 3841  | 975          | ATG                        | TAA                       | –              | 4                                 |
|                    | <i>trnI</i>          | +      | 3846     | 3916  | 71           | –                          | –                         | GAT            | -1                                |
|                    | <i>trnQ</i>          | -      | 3916     | 3986  | 71           | –                          | –                         | TTG            | -1                                |
|                    | <i>trnM</i>          | +      | 3986     | 4060  | 75           | –                          | –                         | CAT            | 1                                 |
|                    | <i>nad2</i>          | +      | 4062     | 5108  | 1047         | ATG                        | TAA                       | –              | -1                                |
|                    | <i>trnW</i>          | +      | 5108     | 5178  | 71           | –                          | –                         | TCA            | 1                                 |
|                    | <i>trnA</i>          | -      | 5180     | 5248  | 69           | –                          | –                         | TGC            | 1                                 |
|                    | <i>trnN</i>          | -      | 5250     | 5322  | 73           | –                          | –                         | GTT            | 3                                 |
|                    | <i>O<sub>L</sub></i> | +      | 5326     | 5357  | 32           | –                          | –                         | –              | -1                                |
|                    | <i>trnC</i>          | -      | 5357     | 5422  | 66           | –                          | –                         | GCA            | 0                                 |
|                    | <i>trnY</i>          | -      | 5423     | 5489  | 67           | –                          | –                         | GTA            | 1                                 |
|                    | <i>cox1</i>          | +      | 5491     | 7041  | 1551         | GTG                        | TAA                       | –              | 0                                 |
|                    | <i>trnS2</i>         | -      | 7042     | 7112  | 71           | –                          | –                         | TGA            | 3                                 |
|                    | <i>trnD</i>          | +      | 7116     | 7186  | 71           | –                          | –                         | GTC            | 8                                 |
|                    | <i>cox2</i>          | +      | 7195     | 7885  | 691          | ATG                        | T                         | –              | 0                                 |
|                    | <i>trnK</i>          | +      | 7886     | 7960  | 75           | –                          | –                         | TTT            | 22                                |
|                    | <i>atp8</i>          | +      | 7983     | 8150  | 168          | ATG                        | TAA                       | –              | -16                               |
|                    | <i>atp6</i>          | +      | 8135     | 8824  | 690          | CTG                        | TAA                       | –              | -1                                |
|                    | <i>cox3</i>          | +      | 8824     | 9609  | 786          | ATG                        | TAA                       | –              | -1                                |
|                    | <i>trnG</i>          | +      | 9609     | 9680  | 72           | –                          | –                         | TCC            | 0                                 |
|                    | <i>nad3</i>          | +      | 9681     | 10031 | 351          | ATG                        | TAG                       | –              | -2                                |
|                    | <i>trnR</i>          | +      | 10030    | 10099 | 70           | –                          | –                         | TCG            | 0                                 |
|                    | <i>nad4l</i>         | +      | 10100    | 10396 | 297          | ATG                        | TAA                       | –              | -7                                |
|                    | <i>nad4</i>          | +      | 10390    | 11770 | 1381         | GTG                        | T                         | –              | 0                                 |
|                    | <i>trnH</i>          | +      | 11771    | 11839 | 69           | –                          | –                         | GTG            | 0                                 |
|                    | <i>trnS1</i>         | +      | 11840    | 11908 | 69           | –                          | –                         | GCT            | 5                                 |
|                    | <i>trnL1</i>         | +      | 11914    | 11986 | 73           | –                          | –                         | TAG            | 0                                 |
|                    | <i>nad5</i>          | +      | 11987    | 13825 | 1839         | ATG                        | TAA                       | –              | -4                                |
|                    | <i>nad6</i>          | -      | 13822    | 14331 | 510          | ATG                        | TAG                       | –              | 12                                |
|                    | <i>trnE</i>          | -      | 14344    | 14412 | 69           | –                          | –                         | TTC            | 5                                 |
|                    | <i>cob</i>           | +      | 14418    | 15554 | 1137         | ATG                        | TAA                       | –              | 4                                 |
|                    | <i>trnT</i>          | +      | 15559    | 15630 | 72           | –                          | –                         | TGT            | -1                                |
|                    | <i>trnP</i>          | -      | 15630    | 15699 | 70           | –                          | –                         | TGG            | 280                               |
|                    | <i>OH</i>            | +      | 15980    | 16492 | 513          | –                          | –                         | –              | 70                                |

\*Intergenic nucleotide: non-coding bases between the features, with a negative number indicating an overlap; – means not applicable.

| Species             | Gene/element         | Strand | Position |       | Size<br>(bp) | Inferred<br>start<br>codon | Inferred<br>stop<br>codon | Anti-<br>codon | Intergenic<br>nucleotide*<br>(bp) |
|---------------------|----------------------|--------|----------|-------|--------------|----------------------------|---------------------------|----------------|-----------------------------------|
|                     |                      |        | From     | To    |              |                            |                           |                |                                   |
| <i>P. chinensis</i> | <i>trnF</i>          | +      | 1        | 69    | 69           | –                          | –                         | GAA            | 0                                 |
|                     | <i>rrnS</i>          | +      | 70       | 1022  | 953          | –                          | –                         | –              | 1                                 |
|                     | <i>trnV</i>          | +      | 1024     | 1096  | 73           | –                          | –                         | TAC            | 26                                |
|                     | <i>rrnL</i>          | +      | 1123     | 2790  | 1668         | –                          | –                         | –              | 0                                 |
|                     | <i>trnL2</i>         | +      | 2791     | 2864  | 74           | –                          | –                         | TAA            | 0                                 |
|                     | <i>nad1</i>          | +      | 2865     | 3839  | 975          | ATG                        | TAA                       | –              | 4                                 |
|                     | <i>trnI</i>          | +      | 3844     | 3914  | 71           | –                          | –                         | GAT            | -1                                |
|                     | <i>trnQ</i>          | -      | 3914     | 3984  | 71           | –                          | –                         | TTG            | -1                                |
|                     | <i>trnM</i>          | +      | 3984     | 4057  | 74           | –                          | –                         | CAT            | 0                                 |
|                     | <i>nad2</i>          | +      | 4058     | 5104  | 1047         | ATG                        | TAA                       | –              | -1                                |
|                     | <i>trnW</i>          | +      | 5104     | 5174  | 71           | –                          | –                         | TCA            | 1                                 |
|                     | <i>trnA</i>          | -      | 5176     | 5244  | 69           | –                          | –                         | TGC            | 1                                 |
|                     | <i>trnN</i>          | -      | 5246     | 5318  | 73           | –                          | –                         | GTT            | 3                                 |
|                     | <i>O<sub>L</sub></i> | +      | 5322     | 5353  | 32           | –                          | –                         | –              | -1                                |
|                     | <i>trnC</i>          | -      | 5353     | 5418  | 66           | –                          | –                         | GCA            | 0                                 |
|                     | <i>trnY</i>          | -      | 5419     | 5485  | 67           | –                          | –                         | GTA            | 1                                 |
|                     | <i>cox1</i>          | +      | 5487     | 7037  | 1551         | GTG                        | TAA                       | –              | 0                                 |
|                     | <i>trnS2</i>         | -      | 7038     | 7108  | 71           | –                          | –                         | TGA            | 3                                 |
|                     | <i>trnD</i>          | +      | 7112     | 7184  | 73           | –                          | –                         | GTC            | 8                                 |
|                     | <i>cox2</i>          | +      | 7193     | 7883  | 691          | ATG                        | T                         | –              | 0                                 |
|                     | <i>trnK</i>          | +      | 7884     | 7958  | 75           | –                          | –                         | TTT            | 28                                |
|                     | <i>atp8</i>          | +      | 7987     | 8154  | 168          | ATG                        | TAA                       | –              | 50                                |
|                     | <i>atp6</i>          | +      | 8205     | 8828  | 624          | ATA                        | TAA                       | –              | -1                                |
|                     | <i>cox3</i>          | +      | 8828     | 9613  | 786          | ATG                        | TAA                       | –              | -1                                |
|                     | <i>trnG</i>          | +      | 9613     | 9684  | 72           | –                          | –                         | TCC            | 0                                 |
|                     | <i>nad3</i>          | +      | 9685     | 10033 | 349          | ATG                        | T                         | –              | 0                                 |
|                     | <i>trnR</i>          | +      | 10034    | 10103 | 70           | –                          | –                         | TCG            | 0                                 |
|                     | <i>nad4l</i>         | +      | 10104    | 10400 | 297          | ATG                        | TAA                       | –              | -7                                |
|                     | <i>nad4</i>          | +      | 10394    | 11774 | 1381         | GTG                        | T                         | –              | 0                                 |
|                     | <i>trnH</i>          | +      | 11775    | 11843 | 69           | –                          | –                         | GTG            | 0                                 |
|                     | <i>trnS1</i>         | +      | 11844    | 11912 | 69           | –                          | –                         | GCT            | 5                                 |
|                     | <i>trnL1</i>         | +      | 11918    | 11990 | 73           | –                          | –                         | TAG            | 0                                 |
|                     | <i>nad5</i>          | +      | 11991    | 13829 | 1839         | ATG                        | TAA                       | –              | -4                                |
|                     | <i>nad6</i>          | -      | 13826    | 14335 | 510          | ATG                        | TAA                       | –              | 12                                |
|                     | <i>trnE</i>          | -      | 14348    | 14416 | 69           | –                          | –                         | TTC            | 5                                 |
|                     | <i>cob</i>           | +      | 14422    | 15558 | 1137         | ATG                        | TAA                       | –              | 4                                 |
|                     | <i>trnT</i>          | +      | 15563    | 15634 | 72           | –                          | –                         | TGT            | -1                                |
|                     | <i>trnP</i>          | -      | 15634    | 15703 | 70           | –                          | –                         | TGG            | 229                               |
|                     | <i>OH</i>            | +      | 15933    | 16479 | 547          | –                          | –                         | –              | 56                                |

\*Intergenic nucleotide: non-coding bases between the features, with a negative number indicating an overlap; – means not applicable.

| Species                | Gene/element         | Strand | Position |       | Size<br>(bp) | Inferred<br>start<br>codon | Inferred<br>stop<br>codon | Anti-<br>codon | Intergenic<br>nucleotide*<br>(bp) |
|------------------------|----------------------|--------|----------|-------|--------------|----------------------------|---------------------------|----------------|-----------------------------------|
|                        |                      |        | From     | To    |              |                            |                           |                |                                   |
| <i>P. echinogaster</i> | <i>trnF</i>          | +      | 1        | 69    | 69           | –                          | –                         | GAA            | 0                                 |
|                        | <i>rrnS</i>          | +      | 70       | 1023  | 954          | –                          | –                         | –              | 0                                 |
|                        | <i>trnV</i>          | +      | 1024     | 1096  | 73           | –                          | –                         | TAC            | 26                                |
|                        | <i>rrnL</i>          | +      | 1123     | 2774  | 1652         | –                          | –                         | –              | 10                                |
|                        | <i>trnL2</i>         | +      | 2785     | 2858  | 74           | –                          | –                         | TAA            | 0                                 |
|                        | <i>nad1</i>          | +      | 2859     | 3833  | 975          | ATG                        | TAA                       | –              | 4                                 |
|                        | <i>trnI</i>          | +      | 3838     | 3908  | 71           | –                          | –                         | GAT            | -1                                |
|                        | <i>trnQ</i>          | -      | 3908     | 3978  | 71           | –                          | –                         | TTG            | -1                                |
|                        | <i>trnM</i>          | +      | 3978     | 4051  | 74           | –                          | –                         | CAT            | 23                                |
|                        | <i>trnM</i>          | +      | 4075     | 4147  | 73           | –                          | –                         | CAT            | 0                                 |
|                        | <i>nad2</i>          | +      | 4148     | 5194  | 1047         | ATG                        | TAA                       | –              | -1                                |
|                        | <i>trnW</i>          | +      | 5194     | 5264  | 71           | –                          | –                         | TCA            | 2                                 |
|                        | <i>trnA</i>          | -      | 5267     | 5335  | 69           | –                          | –                         | TGC            | 1                                 |
|                        | <i>trnN</i>          | -      | 5337     | 5409  | 73           | –                          | –                         | GTT            | 4                                 |
|                        | <i>O<sub>L</sub></i> | +      | 5414     | 5445  | 32           | –                          | –                         | –              | -1                                |
|                        | <i>trnC</i>          | -      | 5445     | 5510  | 66           | –                          | –                         | GCA            | 0                                 |
|                        | <i>trnY</i>          | -      | 5511     | 5577  | 67           | –                          | –                         | GTA            | 1                                 |
|                        | <i>cox1</i>          | +      | 5579     | 7132  | 1554         | GTG                        | AGA                       | –              | -5                                |
|                        | <i>trnS2</i>         | -      | 7128     | 7198  | 71           | –                          | –                         | TGA            | 3                                 |
|                        | <i>trnD</i>          | +      | 7202     | 7271  | 70           | –                          | –                         | GTC            | 8                                 |
|                        | <i>cox2</i>          | +      | 7280     | 7970  | 691          | ATG                        | T                         | –              | 0                                 |
|                        | <i>trnK</i>          | +      | 7971     | 8045  | 75           | –                          | –                         | TTT            | 7                                 |
|                        | <i>atp8</i>          | +      | 8053     | 8220  | 168          | ATG                        | TAA                       | –              | -10                               |
|                        | <i>atp6</i>          | +      | 8211     | 8894  | 684          | ATG                        | TAA                       | –              | -1                                |
|                        | <i>cox3</i>          | +      | 8894     | 9679  | 786          | ATG                        | TAA                       | –              | -1                                |
|                        | <i>trnG</i>          | +      | 9679     | 9750  | 72           | –                          | –                         | TCC            | 0                                 |
|                        | <i>nad3</i>          | +      | 9751     | 10101 | 351          | ATG                        | TAG                       | –              | -2                                |
|                        | <i>trnR</i>          | +      | 10100    | 10169 | 70           | –                          | –                         | TCG            | 0                                 |
|                        | <i>nad4l</i>         | +      | 10170    | 10466 | 297          | ATG                        | TAA                       | –              | 20                                |
|                        | <i>nad4</i>          | +      | 10487    | 11840 | 1354         | ATG                        | T                         | –              | 0                                 |
|                        | <i>trnH</i>          | +      | 11841    | 11909 | 69           | –                          | –                         | GTG            | 0                                 |
|                        | <i>trnS1</i>         | +      | 11910    | 11978 | 69           | –                          | –                         | GCT            | 5                                 |
|                        | <i>trnL1</i>         | +      | 11984    | 12056 | 73           | –                          | –                         | TAG            | 0                                 |
|                        | <i>nad5</i>          | +      | 12057    | 13895 | 1839         | ATG                        | TAG                       | –              | -4                                |
|                        | <i>nad6</i>          | -      | 13892    | 14413 | 522          | GTG                        | TAA                       | –              | 0                                 |
|                        | <i>trnE</i>          | -      | 14414    | 14482 | 69           | –                          | –                         | TTC            | 5                                 |
|                        | <i>cob</i>           | +      | 14488    | 15624 | 1137         | ATG                        | TAA                       | –              | 4                                 |
|                        | <i>trnT</i>          | +      | 15629    | 15700 | 72           | –                          | –                         | TGT            | -1                                |
|                        | <i>trnP</i>          | -      | 15700    | 15770 | 71           | –                          | –                         | TGG            | 258                               |
|                        | <i>OH</i>            | +      | 16029    | 16550 | 522          | –                          | –                         | –              | 1144                              |

\*Intergenic nucleotide: non-coding bases between the features, with a negative number indicating an overlap; – means not applicable.

| Species         | Gene/element | Strand | Position |       | Size<br>(bp) | Inferred<br>start<br>codon | Inferred<br>stop<br>codon | Anti-<br>codon | Intergenic<br>nucleotide*<br>(bp) |
|-----------------|--------------|--------|----------|-------|--------------|----------------------------|---------------------------|----------------|-----------------------------------|
|                 |              |        | From     | To    |              |                            |                           |                |                                   |
| <i>P. minor</i> | <i>trnF</i>  | +      | 1        | 69    | 69           | –                          | –                         | GAA            | 0                                 |
|                 | <i>rrnS</i>  | +      | 70       | 1024  | 955          | –                          | –                         | –              | 2                                 |
|                 | <i>trnV</i>  | +      | 1027     | 1099  | 73           | –                          | –                         | TAC            | 25                                |
|                 | <i>rrnL</i>  | +      | 1125     | 2786  | 1662         | –                          | –                         | –              | 98                                |
|                 | <i>nad1</i>  | +      | 2885     | 3835  | 951          | ATT                        | TAA                       | –              | 46                                |
|                 | <i>trnP</i>  | -      | 3882     | 3949  | 68           | –                          | –                         | TGG            | 264                               |
|                 | <i>OH</i>    | +      | 4214     | 4592  | 379          | –                          | –                         | –              | 399                               |
|                 | <i>trnL2</i> | +      | 4992     | 5066  | 75           | –                          | –                         | TAA            | 77                                |
|                 | <i>OH</i>    | +      | 5144     | 5209  | 66           | –                          | –                         | –              | 0                                 |
|                 | <i>trnI</i>  | +      | 5210     | 5280  | 71           | –                          | –                         | GAT            | -1                                |
|                 | <i>trnQ</i>  | -      | 5280     | 5350  | 71           | –                          | –                         | TTG            | -1                                |
|                 | <i>trnM</i>  | +      | 5350     | 5424  | 75           | –                          | –                         | CAT            | 0                                 |
|                 | <i>nad2</i>  | +      | 5425     | 6471  | 1047         | ATG                        | TAA                       | –              | -1                                |
|                 | <i>trnW</i>  | +      | 6471     | 6541  | 71           | –                          | –                         | TCA            | 2                                 |
|                 | <i>trnA</i>  | -      | 6544     | 6612  | 69           | –                          | –                         | TGC            | 1                                 |
|                 | <i>trnN</i>  | -      | 6614     | 6686  | 73           | –                          | –                         | GTT            | 4                                 |
|                 | <i>OL</i>    | +      | 6691     | 6722  | 32           | –                          | –                         | –              | -1                                |
|                 | <i>trnC</i>  | -      | 6722     | 6787  | 66           | –                          | –                         | GCA            | 0                                 |
|                 | <i>trnY</i>  | -      | 6788     | 6854  | 67           | –                          | –                         | GTA            | 1                                 |
|                 | <i>cox1</i>  | +      | 6856     | 8406  | 1551         | GTG                        | TAA                       | –              | 0                                 |
|                 | <i>trnS2</i> | -      | 8407     | 8477  | 71           | –                          | –                         | TGA            | 3                                 |
|                 | <i>trnD</i>  | +      | 8481     | 8553  | 73           | –                          | –                         | GTC            | 8                                 |
|                 | <i>cox2</i>  | +      | 8562     | 9252  | 691          | ATG                        | T                         | –              | 0                                 |
|                 | <i>trnK</i>  | +      | 9253     | 9327  | 75           | –                          | –                         | TTT            | 21                                |
|                 | <i>atp8</i>  | +      | 9349     | 9516  | 168          | ATG                        | TAA                       | –              | -10                               |
|                 | <i>atp6</i>  | +      | 9507     | 10190 | 684          | ATG                        | TAA                       | –              | -1                                |
|                 | <i>cox3</i>  | +      | 10190    | 10975 | 786          | ATG                        | TAA                       | –              | -1                                |
|                 | <i>trnG</i>  | +      | 10975    | 11046 | 72           | –                          | –                         | TCC            | 0                                 |
|                 | <i>nad3</i>  | +      | 11047    | 11397 | 351          | ATG                        | TAG                       | –              | -2                                |
|                 | <i>trnR</i>  | +      | 11396    | 11464 | 69           | –                          | –                         | TCG            | 0                                 |
|                 | <i>nad4l</i> | +      | 11465    | 11761 | 297          | ATG                        | TAA                       | –              | -7                                |
|                 | <i>nad4</i>  | +      | 11755    | 13135 | 1381         | ATG                        | T                         | –              | 0                                 |
|                 | <i>trnH</i>  | +      | 13136    | 13202 | 67           | –                          | –                         | GTG            | 0                                 |
|                 | <i>trnS1</i> | +      | 13203    | 13270 | 68           | –                          | –                         | GCT            | 5                                 |
|                 | <i>trnL1</i> | +      | 13276    | 13348 | 73           | –                          | –                         | TAG            | 0                                 |
|                 | <i>nad5</i>  | +      | 13349    | 15187 | 1839         | ATG                        | TAA                       | –              | -4                                |
|                 | <i>nad6</i>  | -      | 15184    | 15705 | 522          | GTG                        | TAG                       | –              | 0                                 |
|                 | <i>trnE</i>  | -      | 15706    | 15774 | 69           | –                          | –                         | TTC            | 5                                 |
|                 | <i>cob</i>   | +      | 15780    | 16916 | 1137         | ATG                        | TAG                       | –              | 5                                 |
|                 | <i>trnT</i>  | +      | 16922    | 16993 | 72           | –                          | –                         | TGT            | -1                                |
|                 | <i>trnP</i>  | -      | 16993    | 17062 | 70           | –                          | –                         | TGG            | 264                               |
|                 | <i>OH</i>    | +      | 17327    | 17705 | 379          | –                          | –                         | –              | 358                               |

\*Intergenic nucleotide: non-coding bases between the features, with a negative number indicating an overlap; – means not applicable.

| Species           | Gene/element         | Strand | Position |       | Size<br>(bp) | Inferred<br>start<br>codon | Inferred<br>stop<br>codon | Anti-<br>codon | Intergenic<br>nucleotide*<br>(bp) |
|-------------------|----------------------|--------|----------|-------|--------------|----------------------------|---------------------------|----------------|-----------------------------------|
|                   |                      |        | From     | To    |              |                            |                           |                |                                   |
| <i>P. liuorum</i> | <i>trnF</i>          | +      | 1        | 69    | 69           | –                          | –                         | GAA            | 0                                 |
|                   | <i>rrnS</i>          | +      | 70       | 1021  | 952          | –                          | –                         | –              | 1                                 |
|                   | <i>trnV</i>          | +      | 1023     | 1095  | 73           | –                          | –                         | TAC            | 25                                |
|                   | <i>rrnL</i>          | +      | 1121     | 2791  | 1671         | –                          | –                         | –              | 0                                 |
|                   | <i>trnL2</i>         | +      | 2792     | 2865  | 74           | –                          | –                         | TAA            | 0                                 |
|                   | <i>nad1</i>          | +      | 2866     | 3840  | 975          | ATG                        | TAA                       | –              | 4                                 |
|                   | <i>trnI</i>          | +      | 3845     | 3915  | 71           | –                          | –                         | GAT            | -1                                |
|                   | <i>trnQ</i>          | -      | 3915     | 3985  | 71           | –                          | –                         | TTG            | -1                                |
|                   | <i>trnM</i>          | +      | 3985     | 4058  | 74           | –                          | –                         | CAT            | 0                                 |
|                   | <i>nad2</i>          | +      | 4059     | 5105  | 1047         | ATG                        | TAA                       | –              | -1                                |
|                   | <i>trnW</i>          | +      | 5105     | 5175  | 71           | –                          | –                         | TCA            | 1                                 |
|                   | <i>trnA</i>          | -      | 5177     | 5245  | 69           | –                          | –                         | TGC            | 1                                 |
|                   | <i>trnN</i>          | -      | 5247     | 5319  | 73           | –                          | –                         | GTT            | 3                                 |
|                   | <i>O<sub>L</sub></i> | +      | 5323     | 5354  | 32           | –                          | –                         | –              | -1                                |
|                   | <i>trnC</i>          | -      | 5354     | 5419  | 66           | –                          | –                         | GCA            | 0                                 |
|                   | <i>trnY</i>          | -      | 5420     | 5486  | 67           | –                          | –                         | GTA            | 1                                 |
|                   | <i>cox1</i>          | +      | 5488     | 7038  | 1551         | GTG                        | TAA                       | –              | 0                                 |
|                   | <i>trnS2</i>         | -      | 7039     | 7109  | 71           | –                          | –                         | TGA            | 3                                 |
|                   | <i>trnD</i>          | +      | 7113     | 7183  | 71           | –                          | –                         | GTC            | 8                                 |
|                   | <i>cox2</i>          | +      | 7192     | 7882  | 691          | ATG                        | T                         | –              | 0                                 |
|                   | <i>trnK</i>          | +      | 7883     | 7957  | 75           | –                          | –                         | TTT            | 22                                |
|                   | <i>atp8</i>          | +      | 7980     | 8147  | 168          | ATG                        | TAA                       | –              | -10                               |
|                   | <i>atp6</i>          | +      | 8138     | 8821  | 684          | ATG                        | TAA                       | –              | -1                                |
|                   | <i>cox3</i>          | +      | 8821     | 9606  | 786          | ATG                        | TAA                       | –              | -1                                |
|                   | <i>trnG</i>          | +      | 9606     | 9677  | 72           | –                          | –                         | TCC            | 0                                 |
|                   | <i>nad3</i>          | +      | 9678     | 10028 | 351          | ATG                        | TAG                       | –              | -2                                |
|                   | <i>trnR</i>          | +      | 10027    | 10096 | 70           | –                          | –                         | TCG            | 0                                 |
|                   | <i>nad4l</i>         | +      | 10097    | 10393 | 297          | ATG                        | TAA                       | –              | -7                                |
|                   | <i>nad4</i>          | +      | 10387    | 11767 | 1381         | GTG                        | T                         | –              | 0                                 |
|                   | <i>trnH</i>          | +      | 11768    | 11836 | 69           | –                          | –                         | GTG            | 0                                 |
|                   | <i>trnS1</i>         | +      | 11837    | 11905 | 69           | –                          | –                         | GCT            | 5                                 |
|                   | <i>trnL1</i>         | +      | 11911    | 11983 | 73           | –                          | –                         | TAG            | 0                                 |
|                   | <i>nad5</i>          | +      | 11984    | 13822 | 1839         | ATG                        | TAA                       | –              | -4                                |
|                   | <i>nad6</i>          | -      | 13819    | 14328 | 510          | ATG                        | TAG                       | –              | 12                                |
|                   | <i>trnE</i>          | -      | 14341    | 14409 | 69           | –                          | –                         | TTC            | 5                                 |
|                   | <i>cob</i>           | +      | 14415    | 15551 | 1137         | ATG                        | TAA                       | –              | 4                                 |
|                   | <i>trnT</i>          | +      | 15556    | 15627 | 72           | –                          | –                         | TGT            | -1                                |
|                   | <i>trnP</i>          | -      | 15627    | 15696 | 70           | –                          | –                         | TGG            | 270                               |
|                   | <i>OH</i>            | +      | 15967    | 16487 | 521          | –                          | –                         | –              | 55                                |

\*Intergenic nucleotide: non-coding bases between the features, with a negative number indicating an overlap; – means not applicable.
