# Supplementary material for: Comparative Analysis of the Systematics and Evolution of the Pampus Genus of Fish (Perciformes: Stromateidae) Based on Osteology, Population Genetics and Complete Mitogenomes
Source: MDPI journal article supplement (doi:10.3390/ani14050814), 2024-03-06
Supplement: s1 [file s1]

# *Pampus argenteus*

*trnF* (1-69)

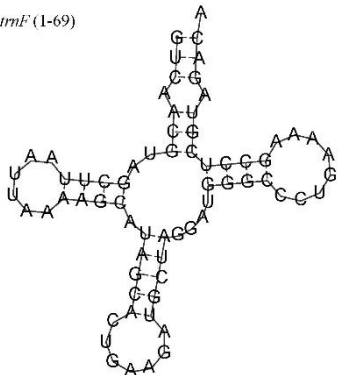

*trnV* (1024-1096)

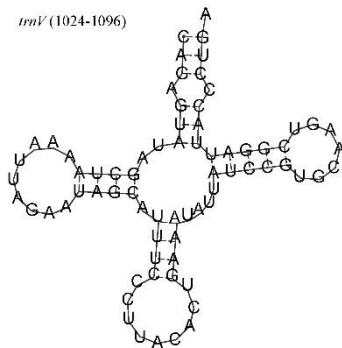

*trnL2* (2785-2858)

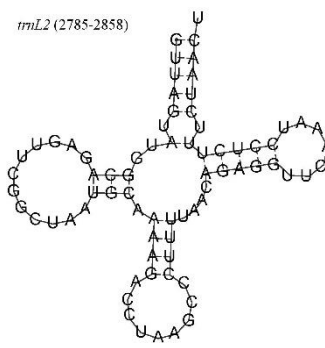

*trnI* (3838-3908)

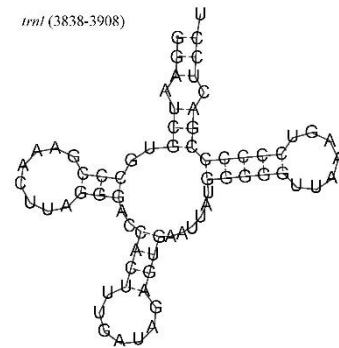

*trnQ* (3908-3978)

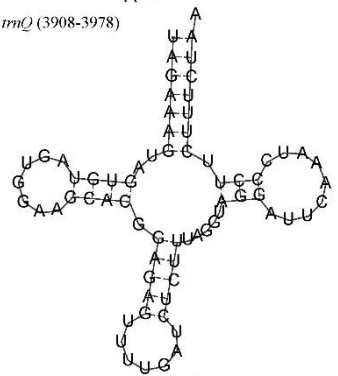

*trnM* (3978-4051)

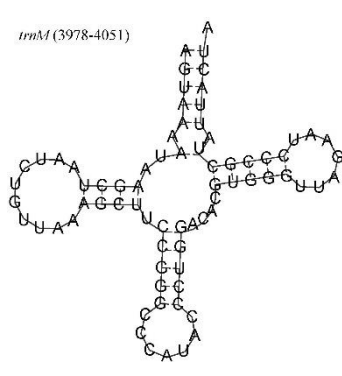

*trnM* (4075-4147)

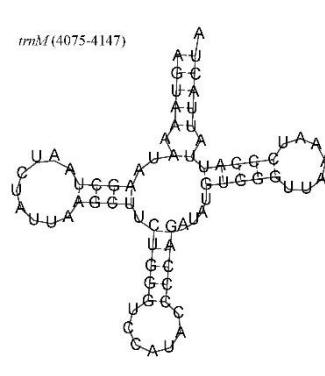

*trnW* (5194-5264)

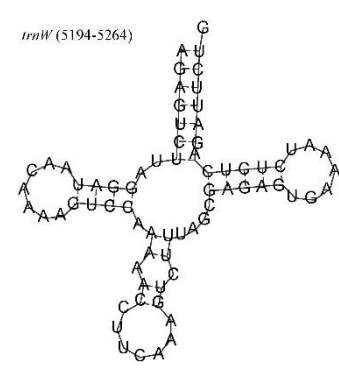

*trnA* (5267-5335)

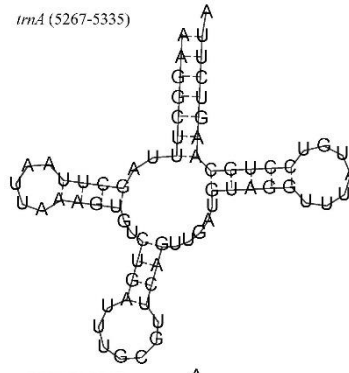

*trnN* (5337-5409)

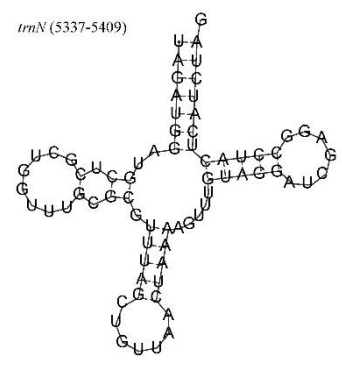

*OL* (5414-5445)

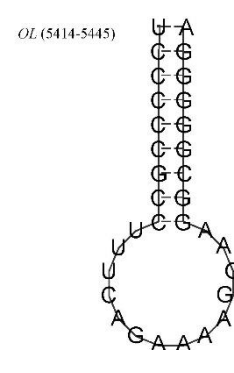

*trnC* (5445-5510)

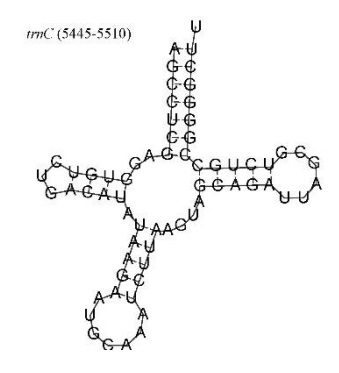

*trnY* (5511-5577)

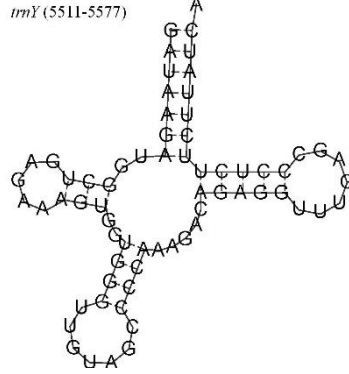

*trnS2* (7128-7198)

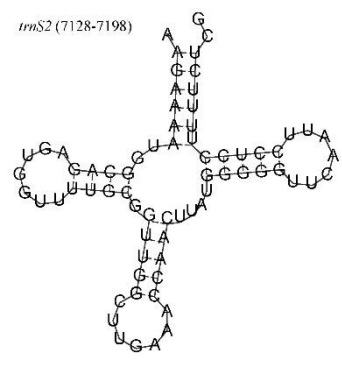

*trnD* (7202-7271)

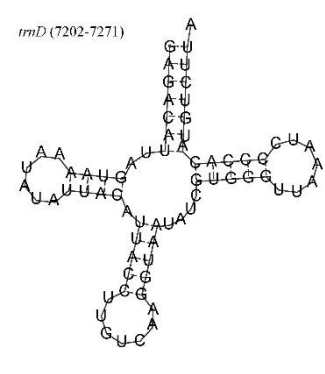

*trnK* (7971-8045)

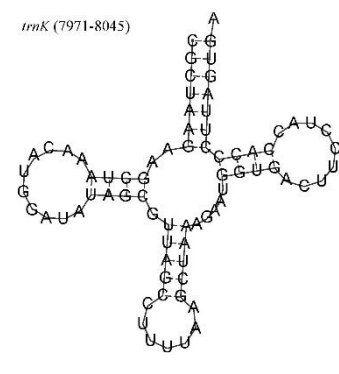

*trnG* (9679-9750)

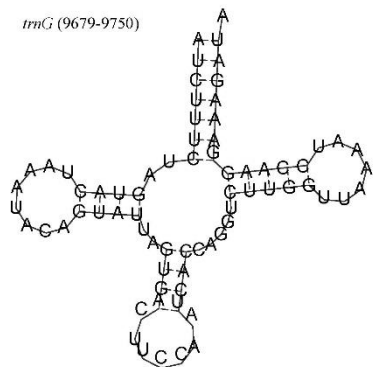

*trnR* (10100-10169)

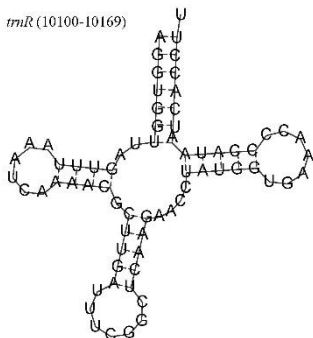

*trnH* (11841-11909)

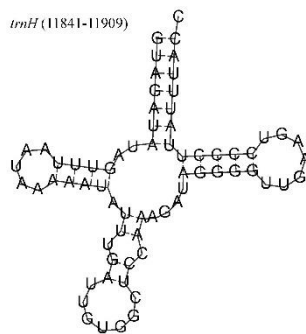

*trnS1* (11910-11978)

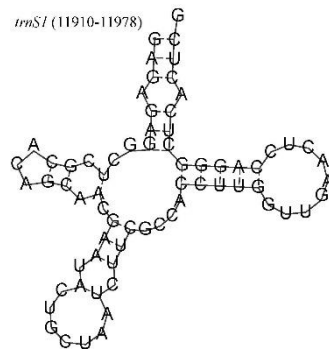

*trnL1* (11984-12056)

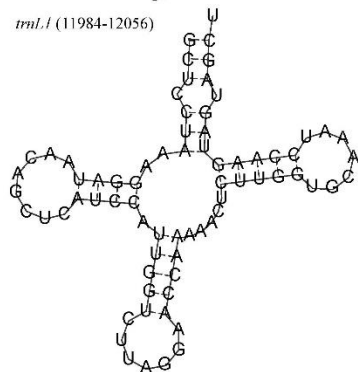

*trnK* (14414-14482)

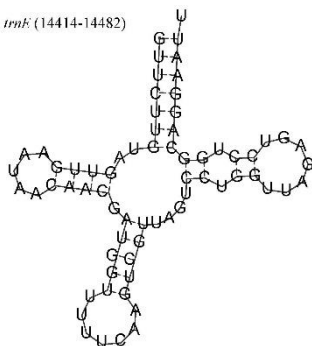

*trnI* (15629-15700)

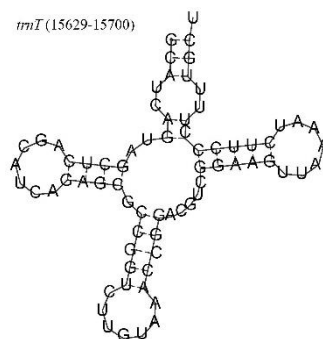

*trnP* (15700-15770)

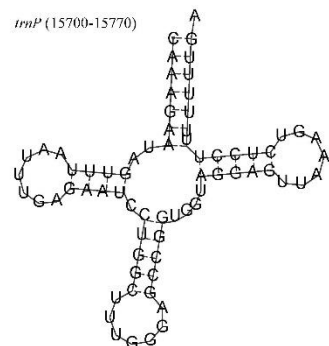

# *Pampus punctatissimus*

*trnF* (1-69)

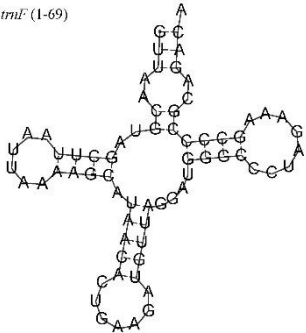

*trnV* (1024-1096)

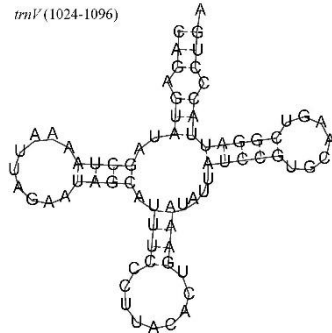

*trnL2* (2789-2862)

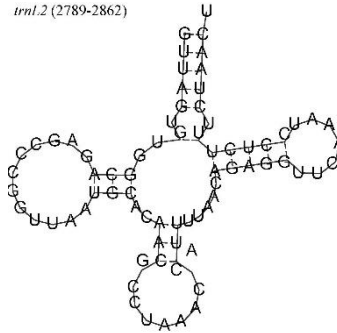

*trnI* (3842-3912)

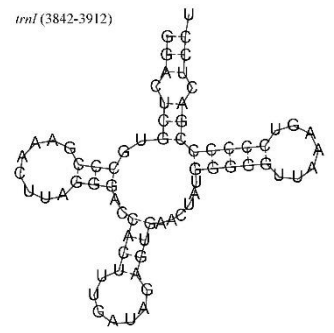

*trnQ* (3912-3982)

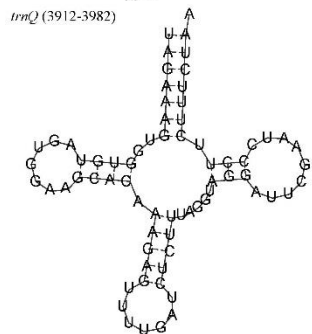

*trnM* (3982-4055)

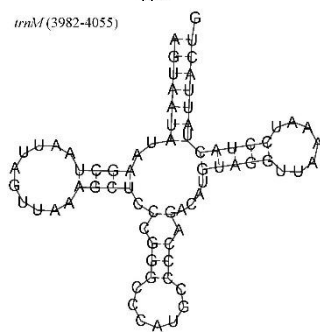

*trnW* (5102-5172)

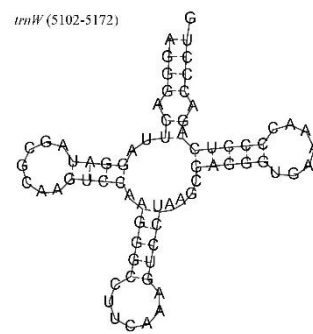

*trnI* (5174-5242)

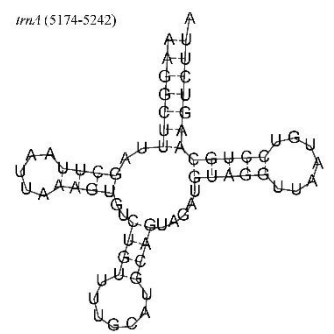

*trnN* (5244-5316)

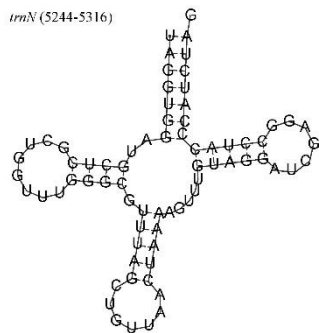

*OL* (5320-5351)

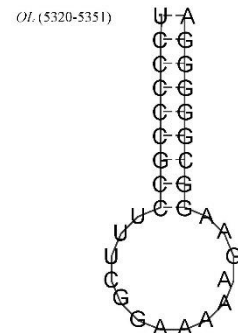

*trnC* (5351-5416)

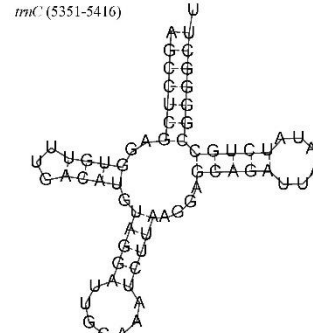

*trnY* (5417-5483)

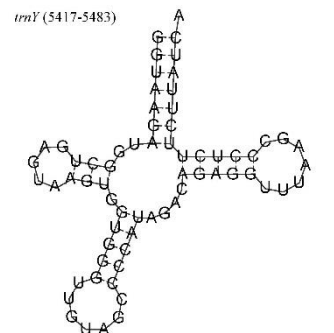

*trnS2* (7036-7106)

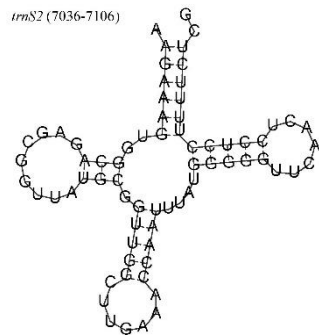

*trnD* (7110-7182)

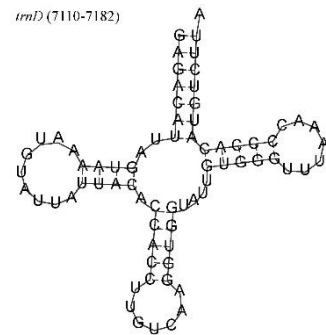

*trnK* (7882-7965)

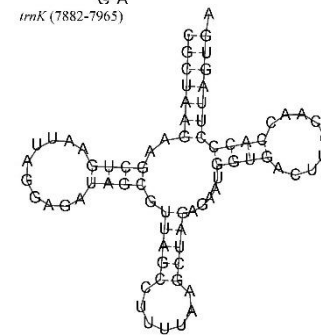

*trnG* (9611-9682)

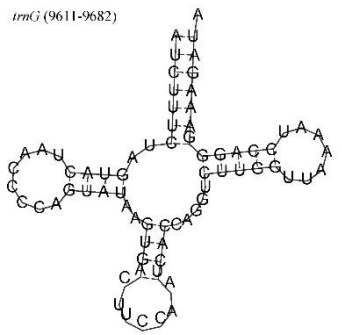

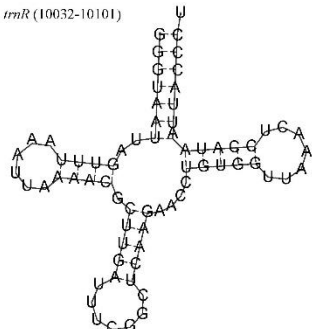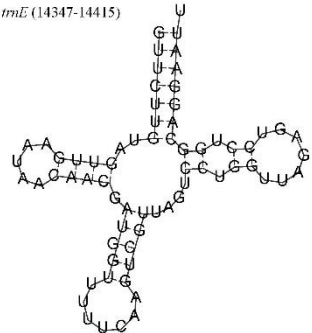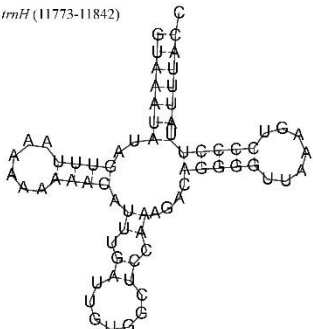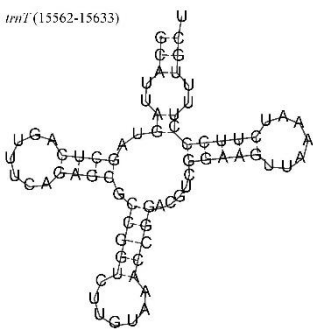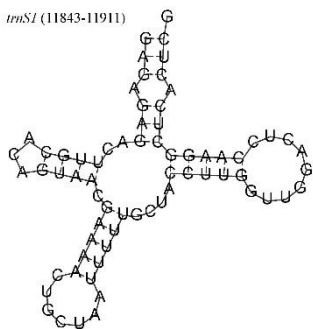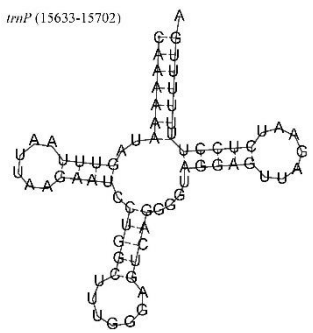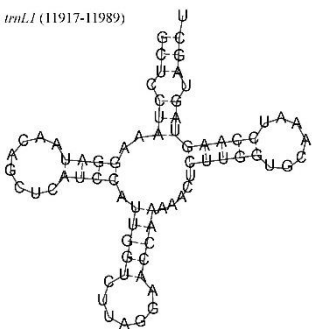

# *Pampus cinereus*

*trnL*<sup>1</sup> (1-69)

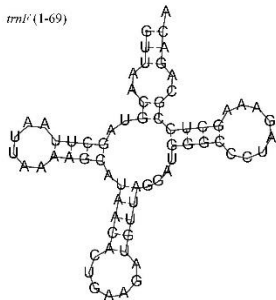

*trnL*<sup>2</sup> (1025-1097)

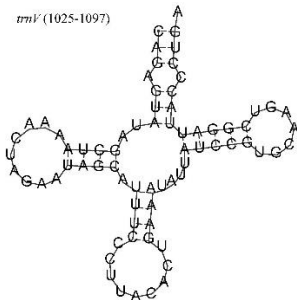

*trnL*<sup>2</sup> (2793-2866)

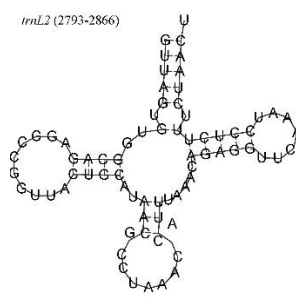

*trnL* (3846-3916)

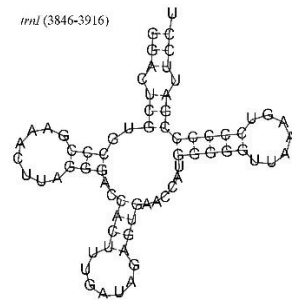

*trnL*<sup>2</sup> (3916-3986)

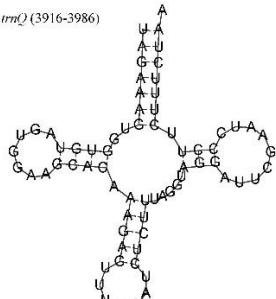

*trnM* (3986-4060)

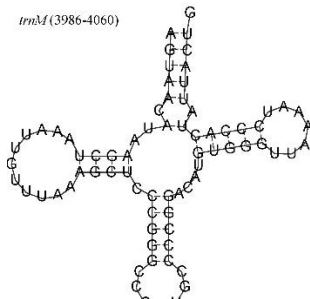

*trnW* (5108-5178)

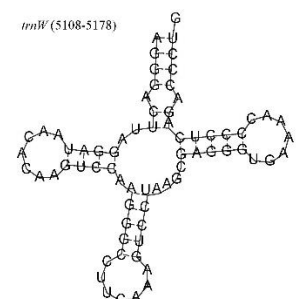

*trnI* (5180-5248)

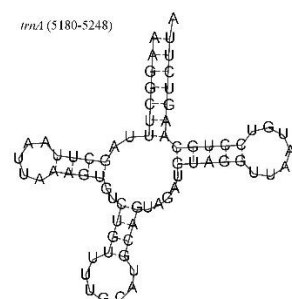

*trnN* (5250-5322)

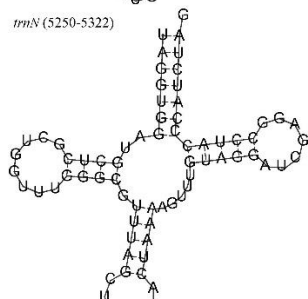

*OL* (5326-5357)

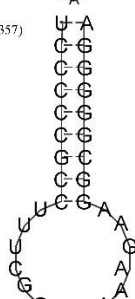

*trnC* (5357-5422)

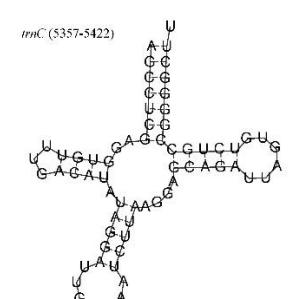

*trnY* (5423-5489)

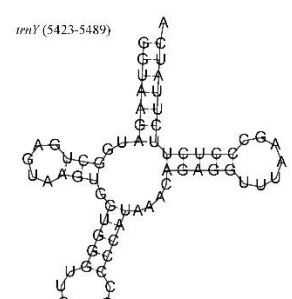

*trnS*<sup>2</sup> (7042-7112)

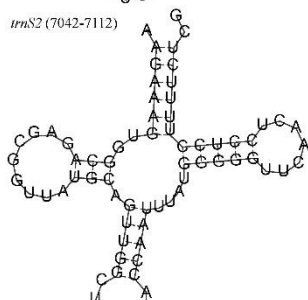

*trnD* (7116-7186)

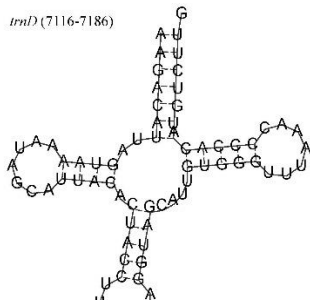

*trnK* (7886-7960)

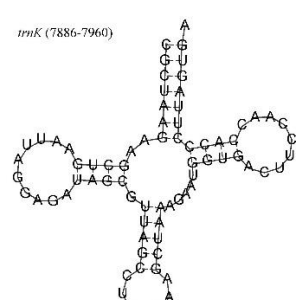

*trnG* (9609-9680)

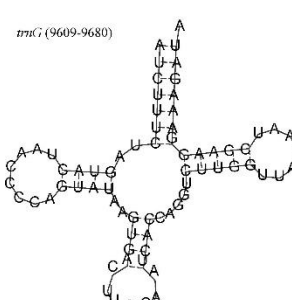

*trnR* (10030-10099)

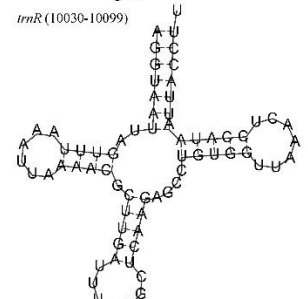

*trnI*<sup>1</sup> (11771-11839)

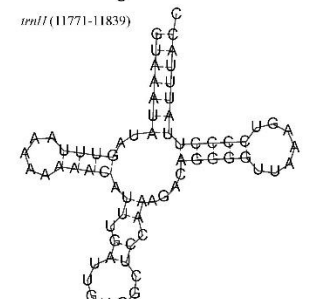

*trnS*<sup>1</sup> (11840-11908)

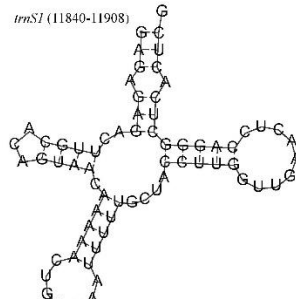

*trnL*<sup>1</sup> (11914-11986)

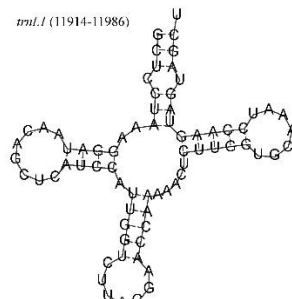

[illegible]

# *Pampus chinensis*

*trnI*<sup>+</sup> (1-69)

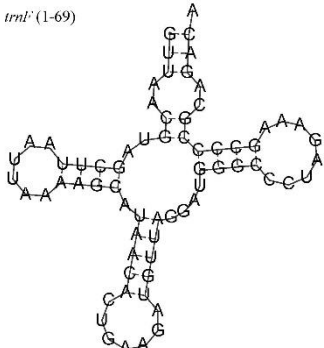

*trnV* (1024-1096)

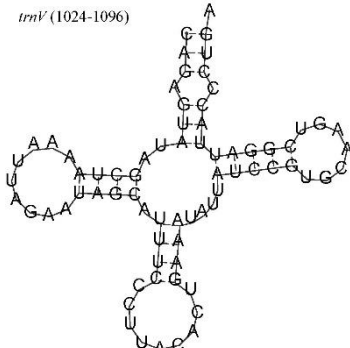

*trnL2* (2791-2864)

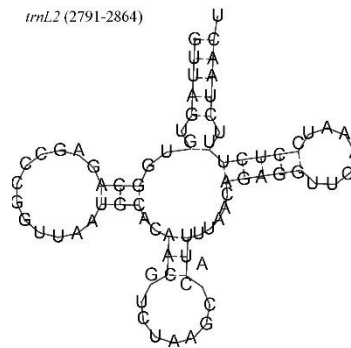

*trnI* (3844-3914)

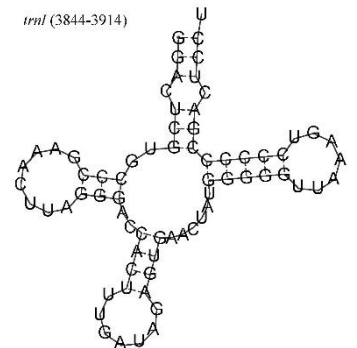

*trnQ* (3914-3984)

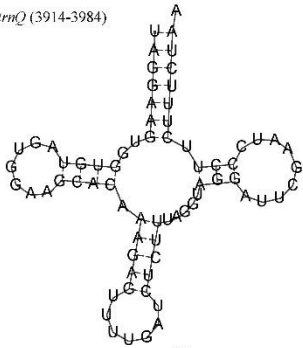

*trnM* (3984-4057)

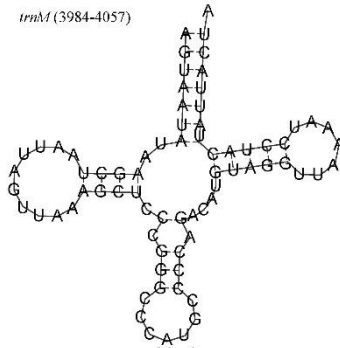

*trnW* (5104-5174)

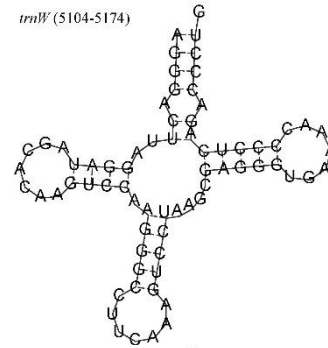

*trnA* (5176-5244)

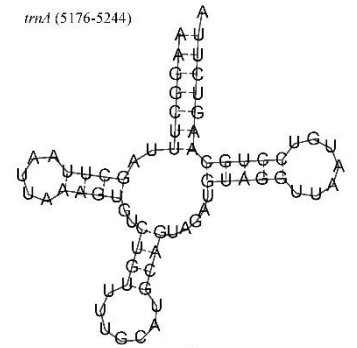

*trnN* (5246-5318)

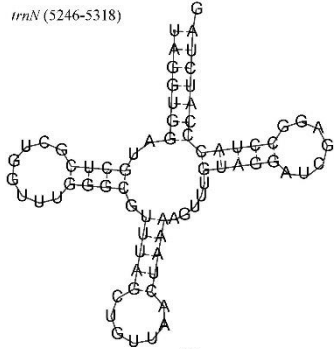

*OL* (5322-5418)

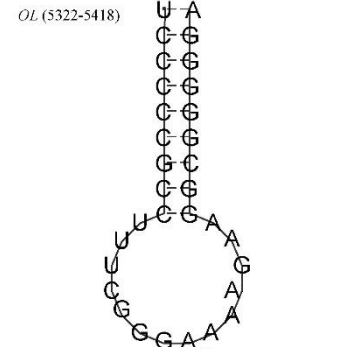

*trnC* (5353-5418)

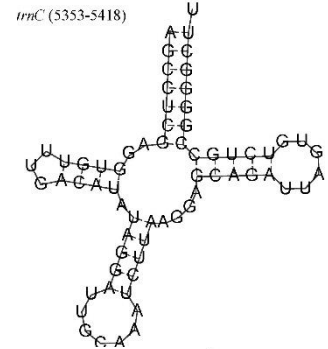

*trnY* (5419-5485)

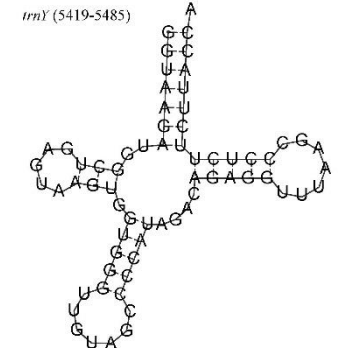

*trnS2* (7038-7108)

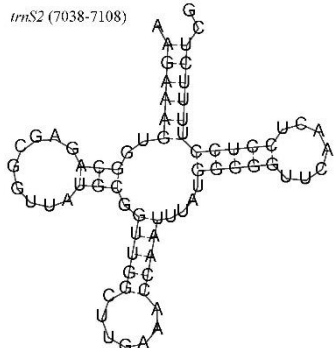

*trnD* (7112-7184)

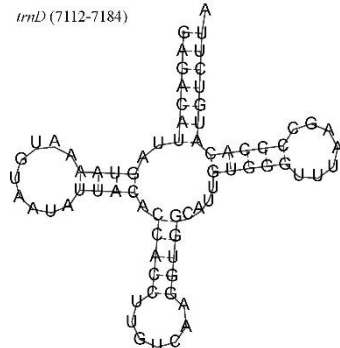

*trnK* (7884-7958)

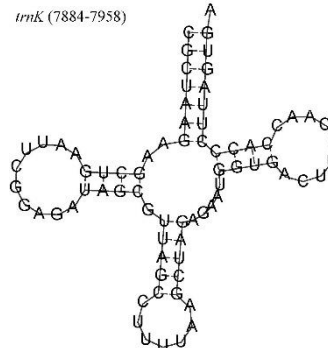

*trnG* (9613-9684)

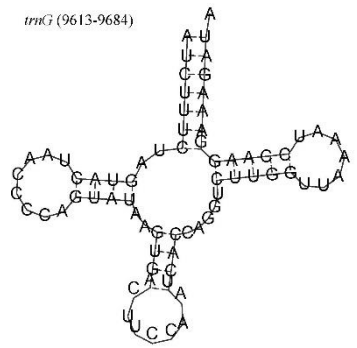

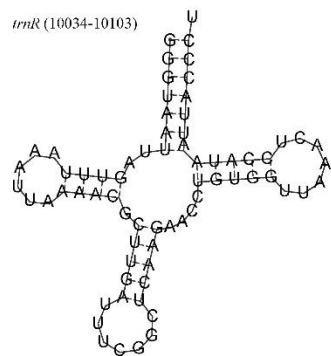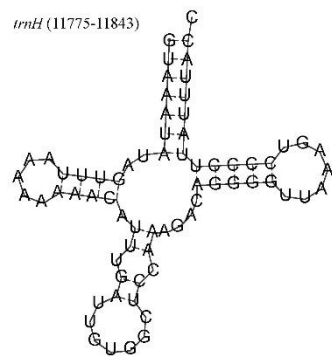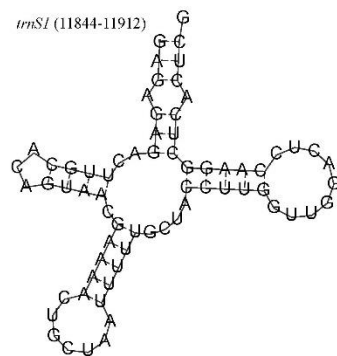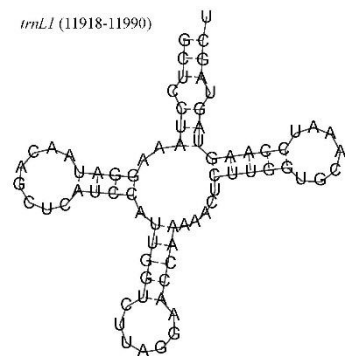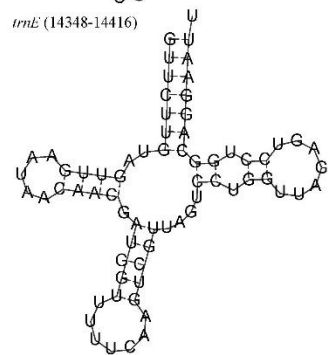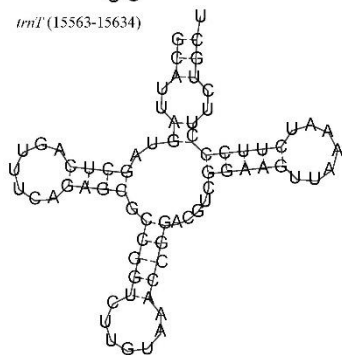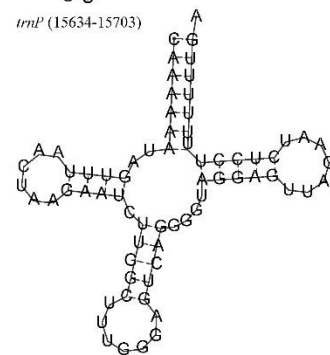

# *Pampus echinogaster*

*trnF* (1-69)

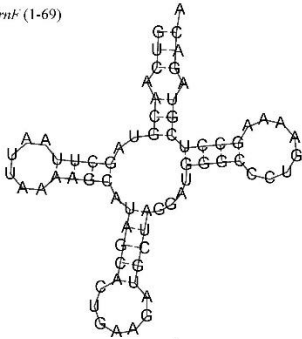

*trnV* (1024-1096)

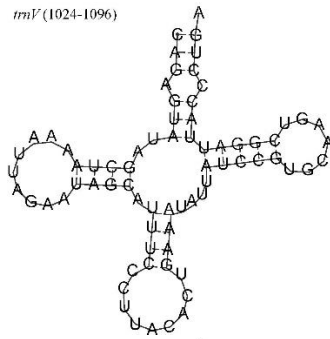

*trnL2* (2785-2858)

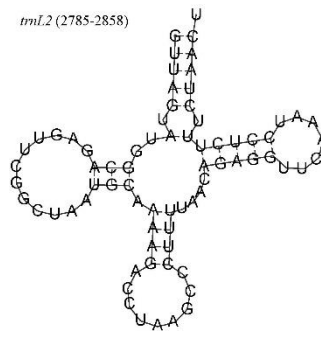

*trnI* (3838-3908)

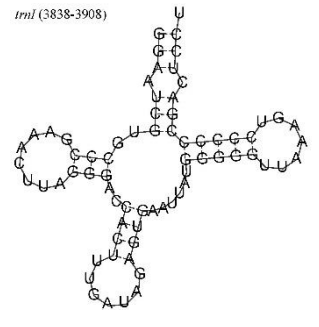

*trnQ* (3908-3978)

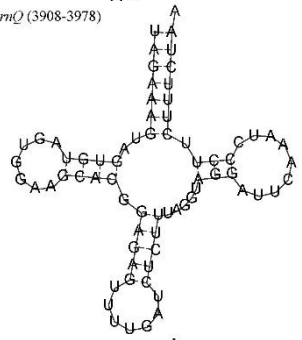

*trnM* (3978-4051)

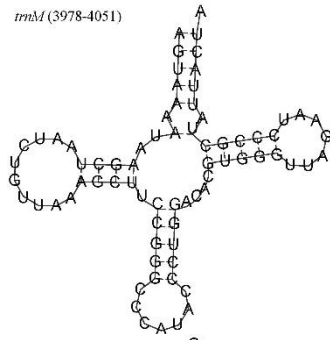

*trnM* (4075-4147)

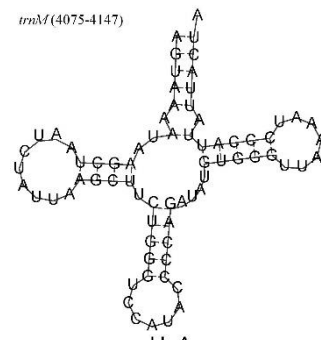

*trnW* (5194-5264)

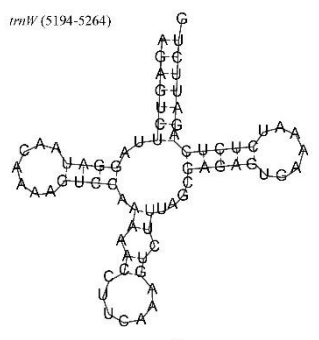

*trnA* (5267-5335)

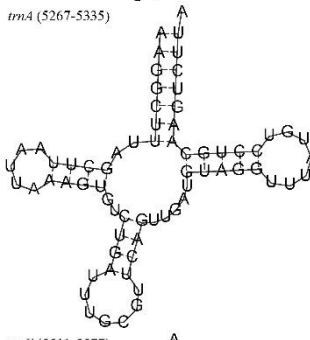

*trnN* (5337-5409)

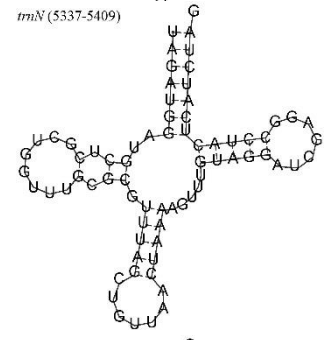

*OL* (5414-5445)

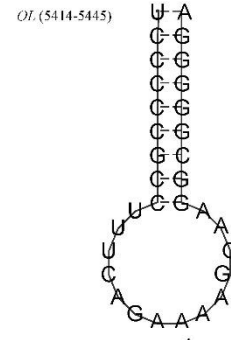

*trnC* (5445-5510)

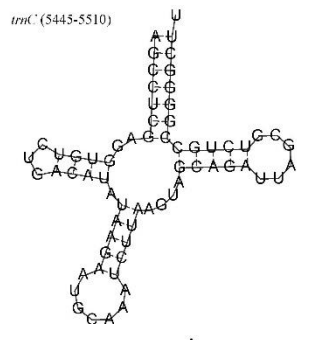

*trnY* (5511-5577)

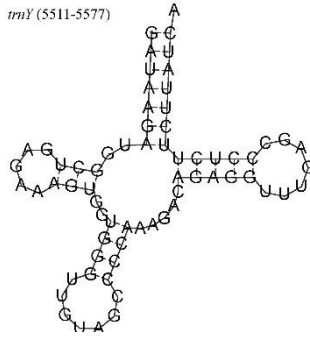

*trnS2* (7128-7198)

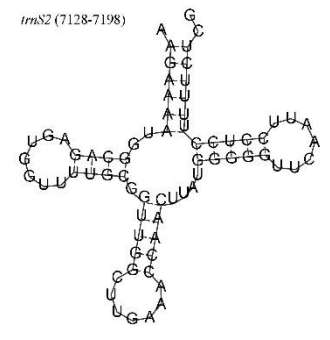

*trnD* (7202-7271)

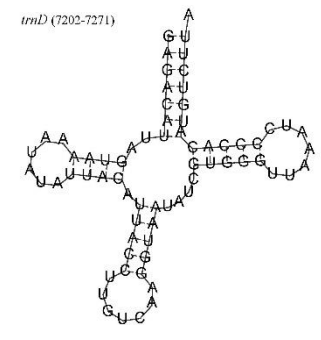

*trnK* (7971-8045)

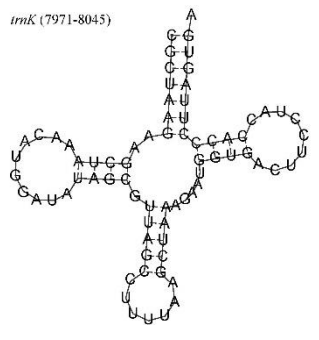

*trnG* (9679-9750)

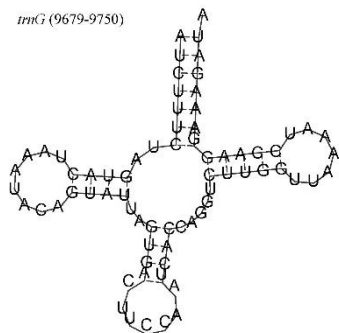

*trnR* (10100-10169)

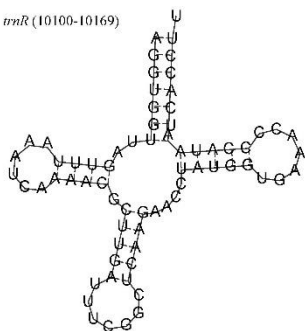

*trnH* (11841-11909)

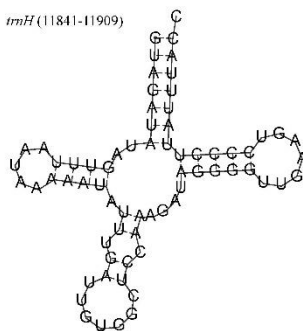

*trnS* (11910-11978)

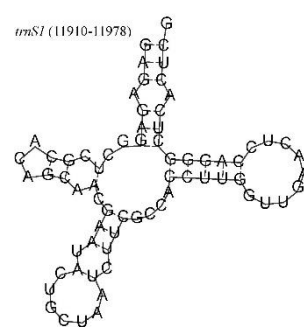

*trnL1* (11984-12056)

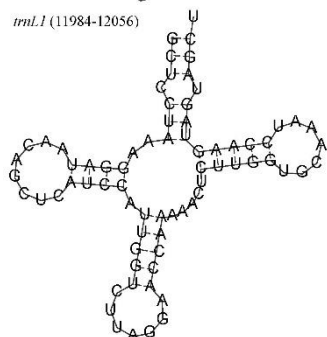

*trnE* (14414-14482)

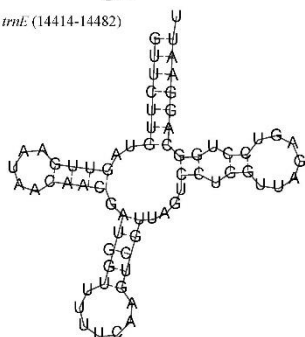

*trnT* (15629-15700)

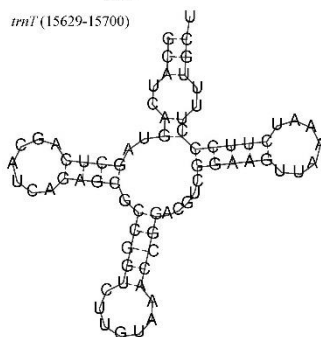

*trnP* (15700-15770)

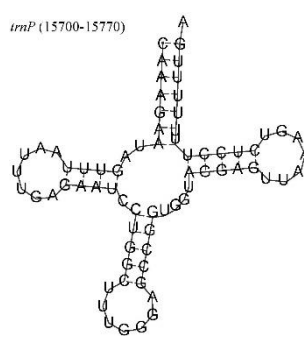

# *Pampus minor*

*trnI'* (1-69)

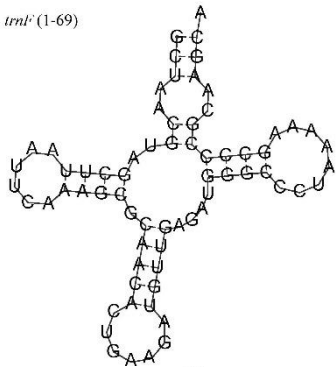

*trnV* (1027-1099)

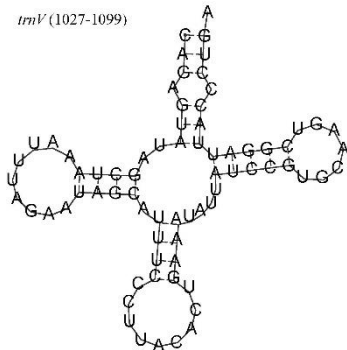

*trnP* (3882-3949)

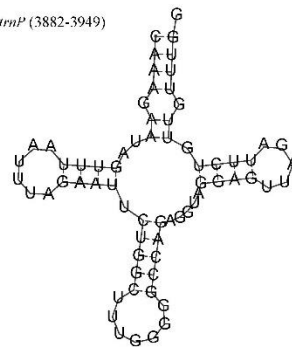

*trnI.2* (4992-5066)

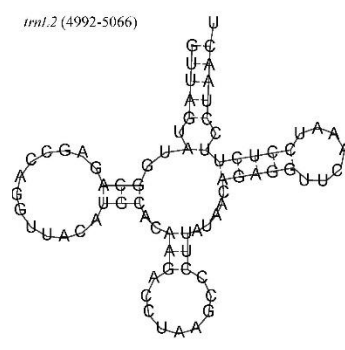

*trnI* (5210-5280)

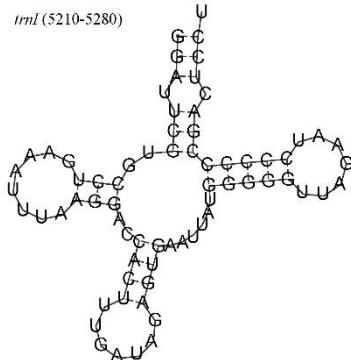

*trnQ* (5280-5350)

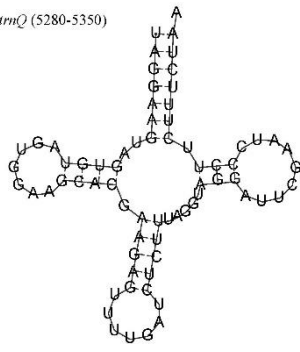

*trnM* (5350-5424)

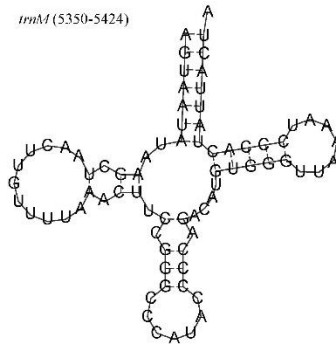

*trnW* (6471-6541)

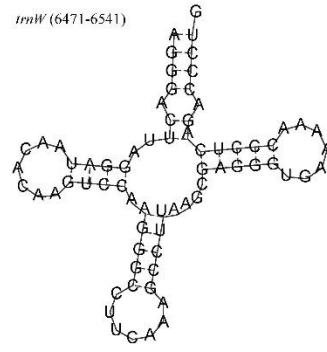

*trnA* (6544-6612)

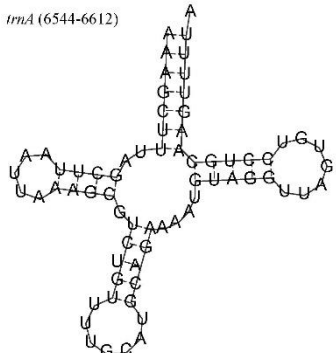

*trnN* (6614-6686)

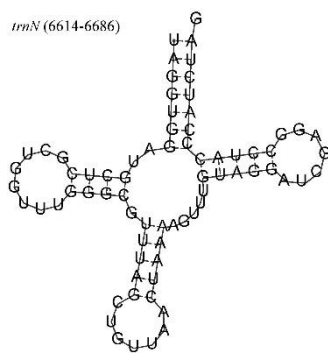

*OL* (6691-6722)

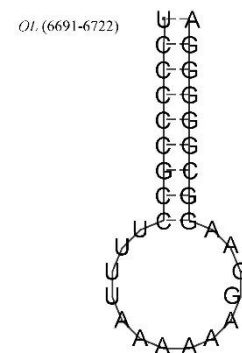

*trnC* (6722-6787)

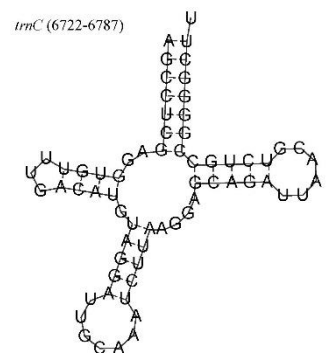

*trnY* (6788-6854)

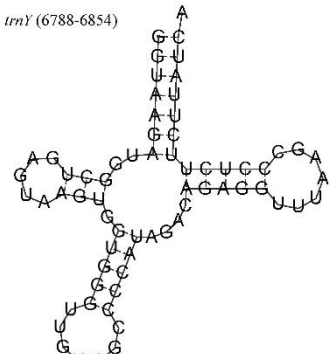

*trnS2* (8407-8477)

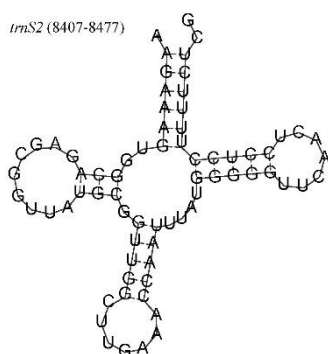

*trnD* (8481-8553)

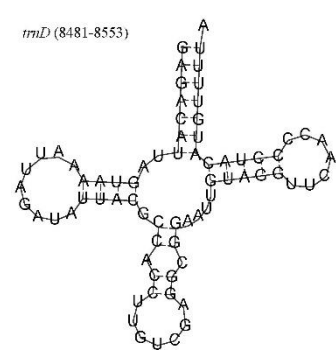

*trnK* (9253-9327)

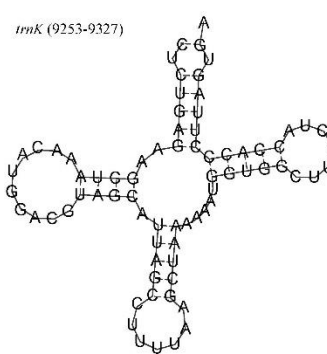

*trnG* (10975-11046)

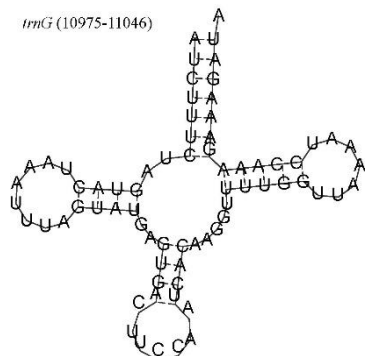

*trnR* (11396-11464)

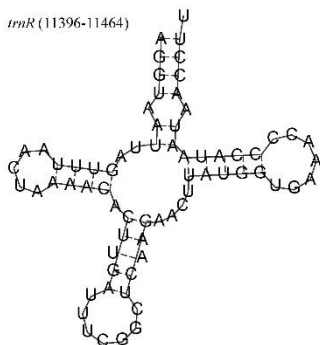

*trnH* (13136-13202)

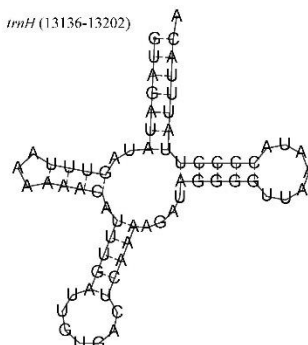

*trnS1* (13203-13270)

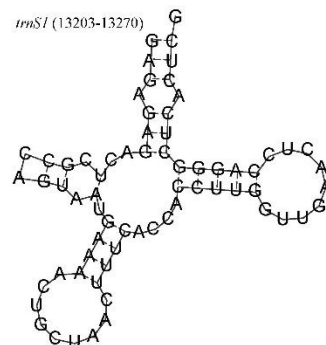

*trnL1* (13276-13378)

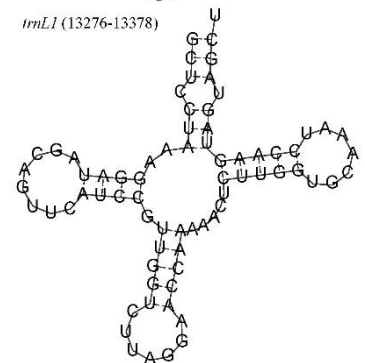

*trnE* (15706-15774)

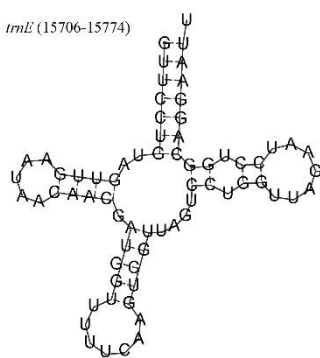

*trnT* (16922-16993)

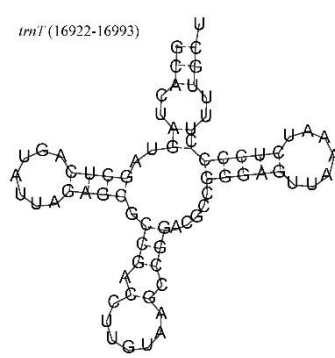

*trnP* (16993-17062)

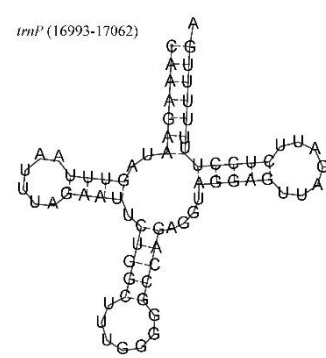

# *Pampus liuorum*

*trnF* (1-69)

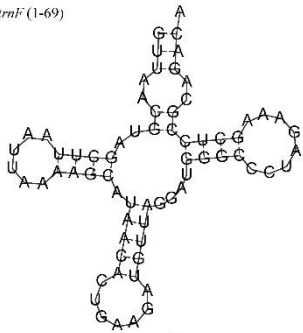

*trnV* (1023-1095)

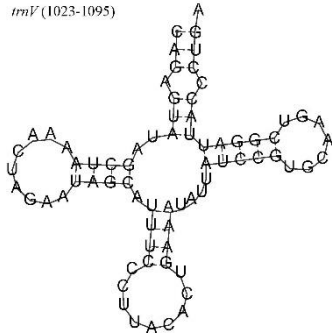

*trnL2* (2792-2865)

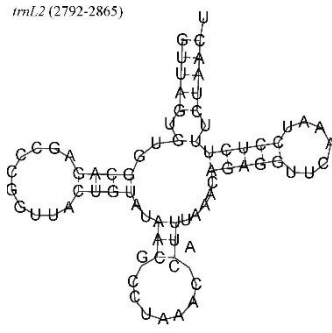

*trnI* (3845-3915)

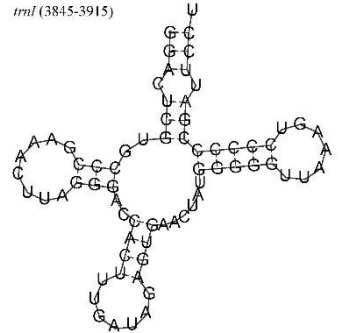

*trnQ* (3915-3985)

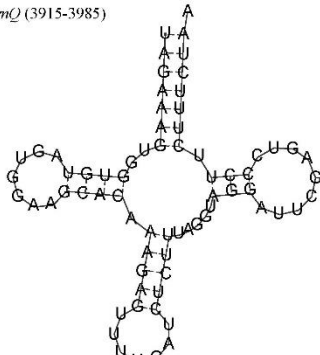

*trnM* (3985-4058)

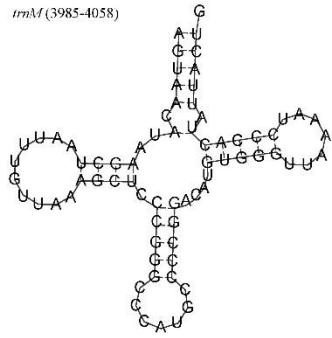

*trnW* (5105-5175)

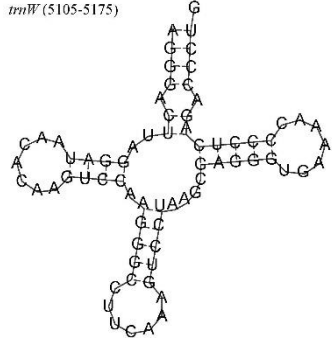

*trnA* (5177-5245)

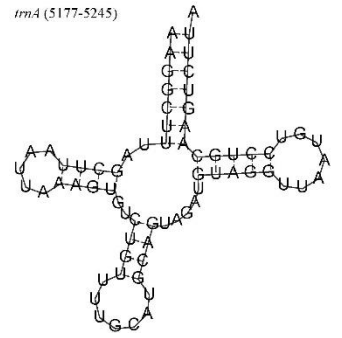

*trnN* (5247-5319)

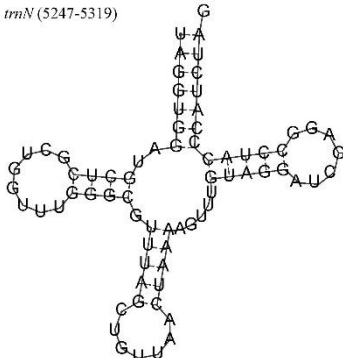

*OLI* (5323-5354)

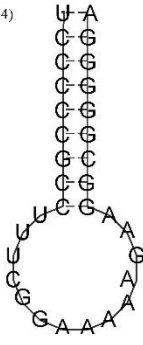

*trnC* (5354-5419)

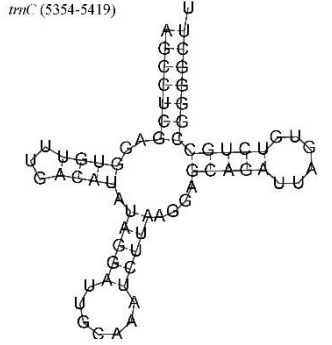

*trnY* (5420-5486)

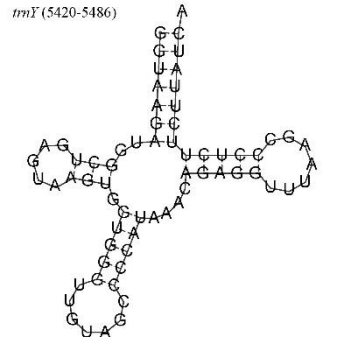

*trnS2* (7039-7109)

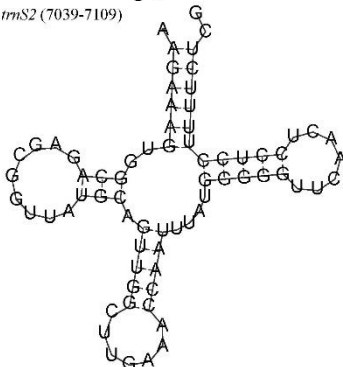

*trnI* (7113-7183)

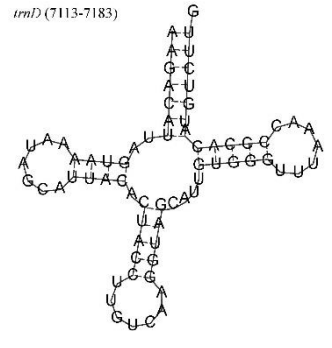

*trnK* (7883-7957)

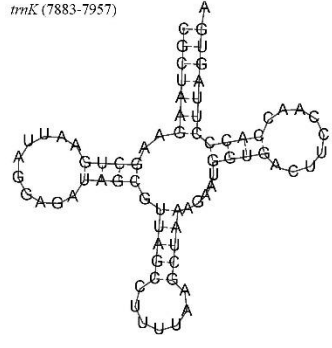

*trnG* (9606-9677)

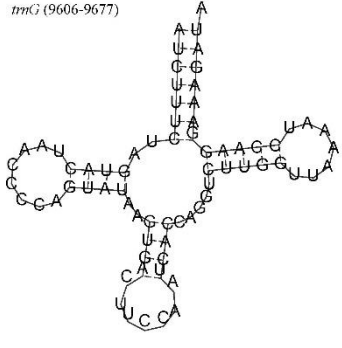

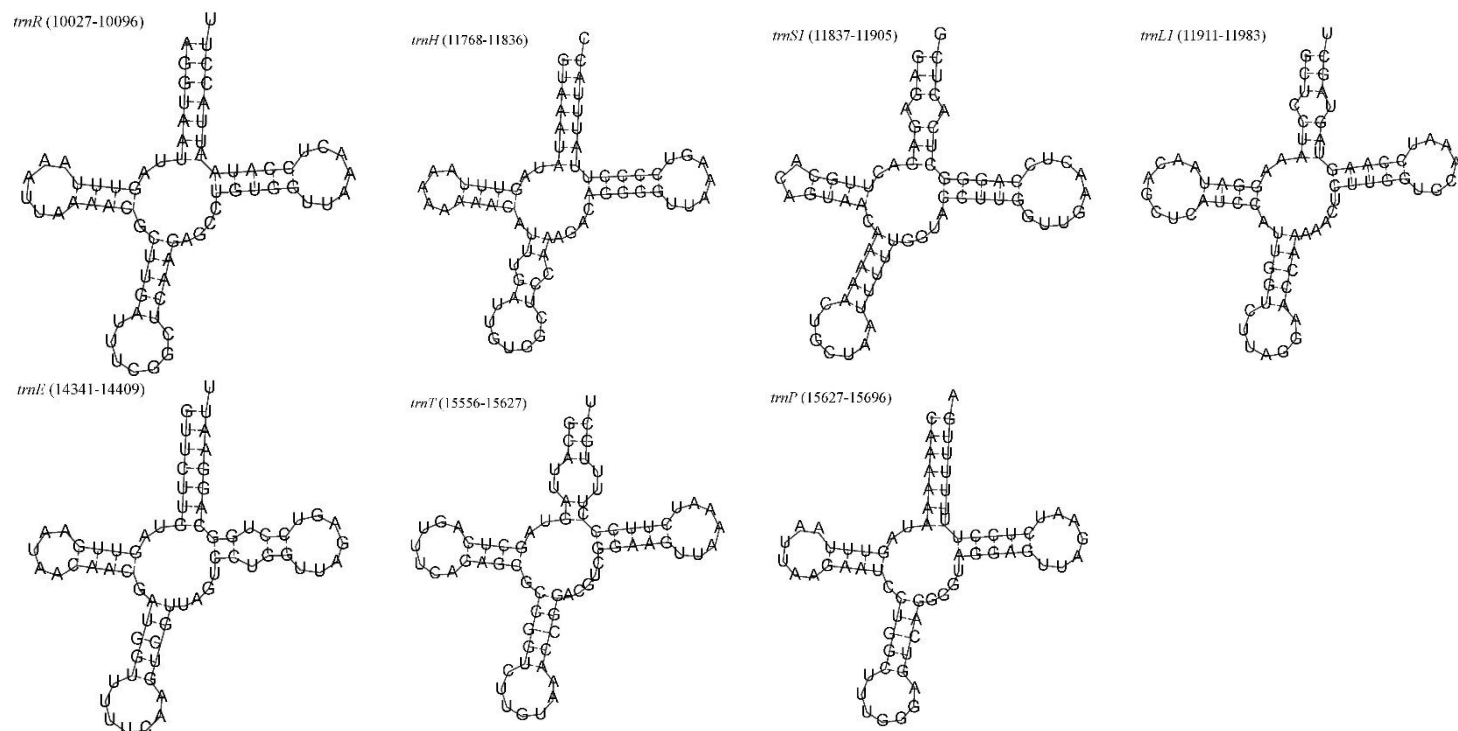

Fig. S13 Schematic diagram of the secondary structure of all tRNAs in the mitochondrial genome of the genus *Pampus*
