# Supplementary material for: Comparative Analysis of the Systematics and Evolution of the Pampus Genus of Fish (Perciformes: Stromateidae) Based on Osteology, Population Genetics and Complete Mitogenomes
Source: MDPI journal article supplement (doi:10.3390/ani14050814), 2024-03-06
Supplement: s1 [file s1]

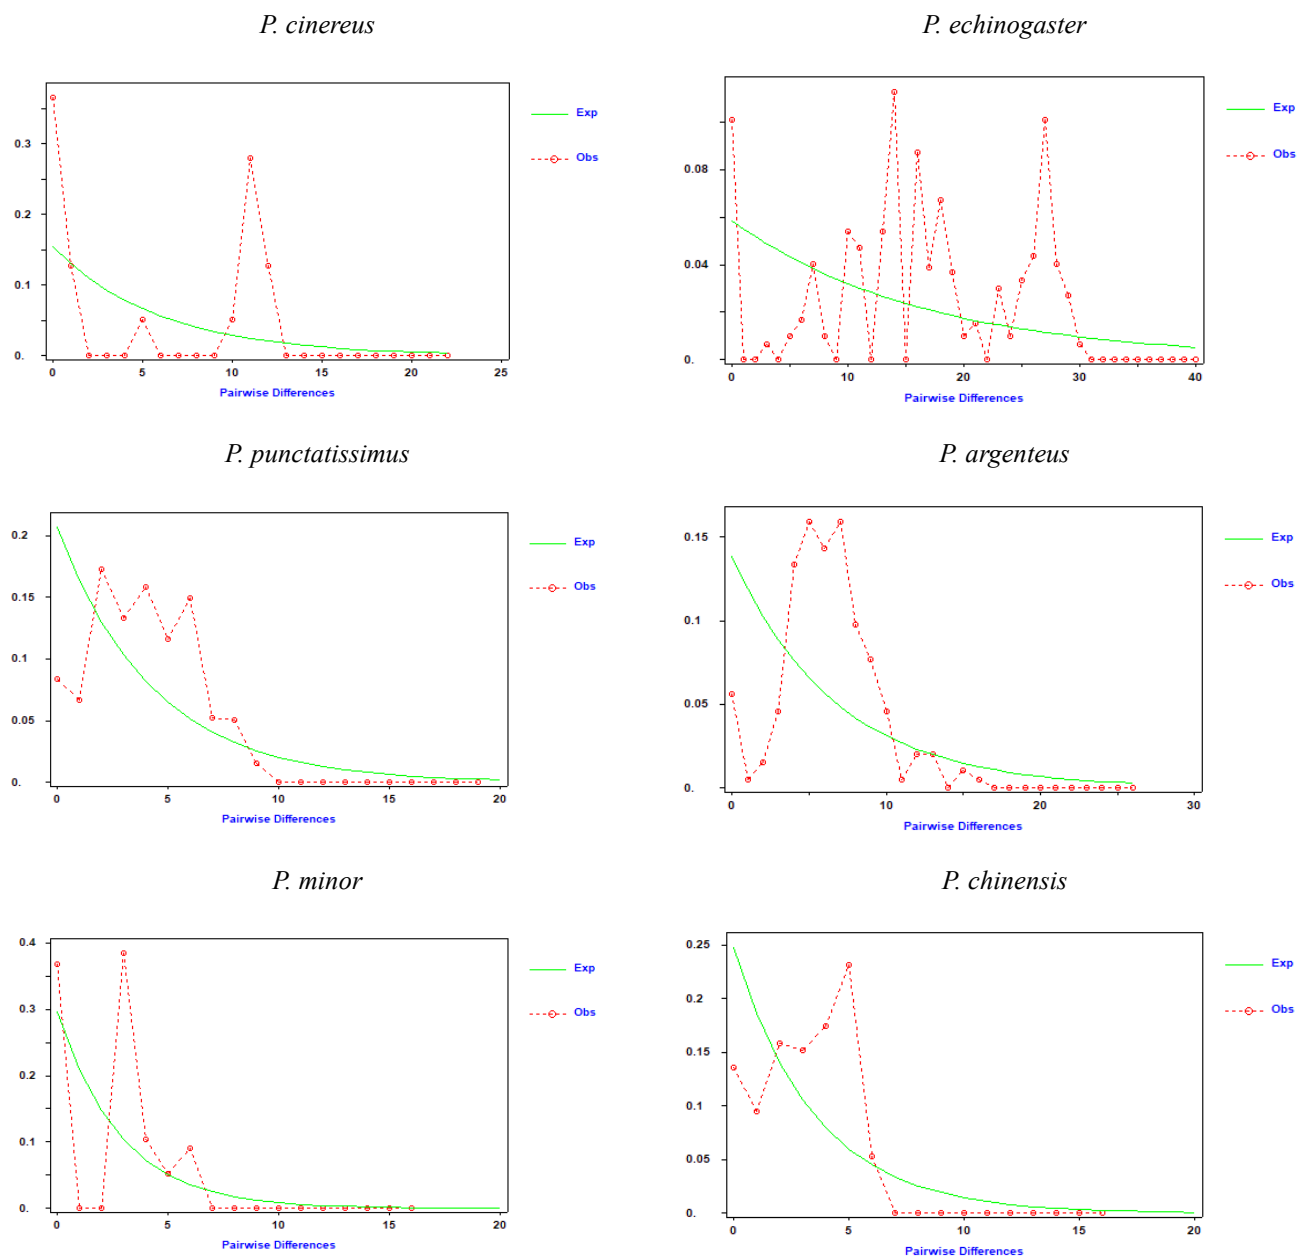

**Fig. S3** Mismatch distribution for demographic expansion of the genus *Pampus* based on nuclear *S7* gene
