# Supplementary material for: Comparative Analysis of the Systematics and Evolution of the Pampus Genus of Fish (Perciformes: Stromateidae) Based on Osteology, Population Genetics and Complete Mitogenomes
Source: MDPI journal article supplement (doi:10.3390/ani14050814), 2024-03-06
Supplement: s1 [file s1]

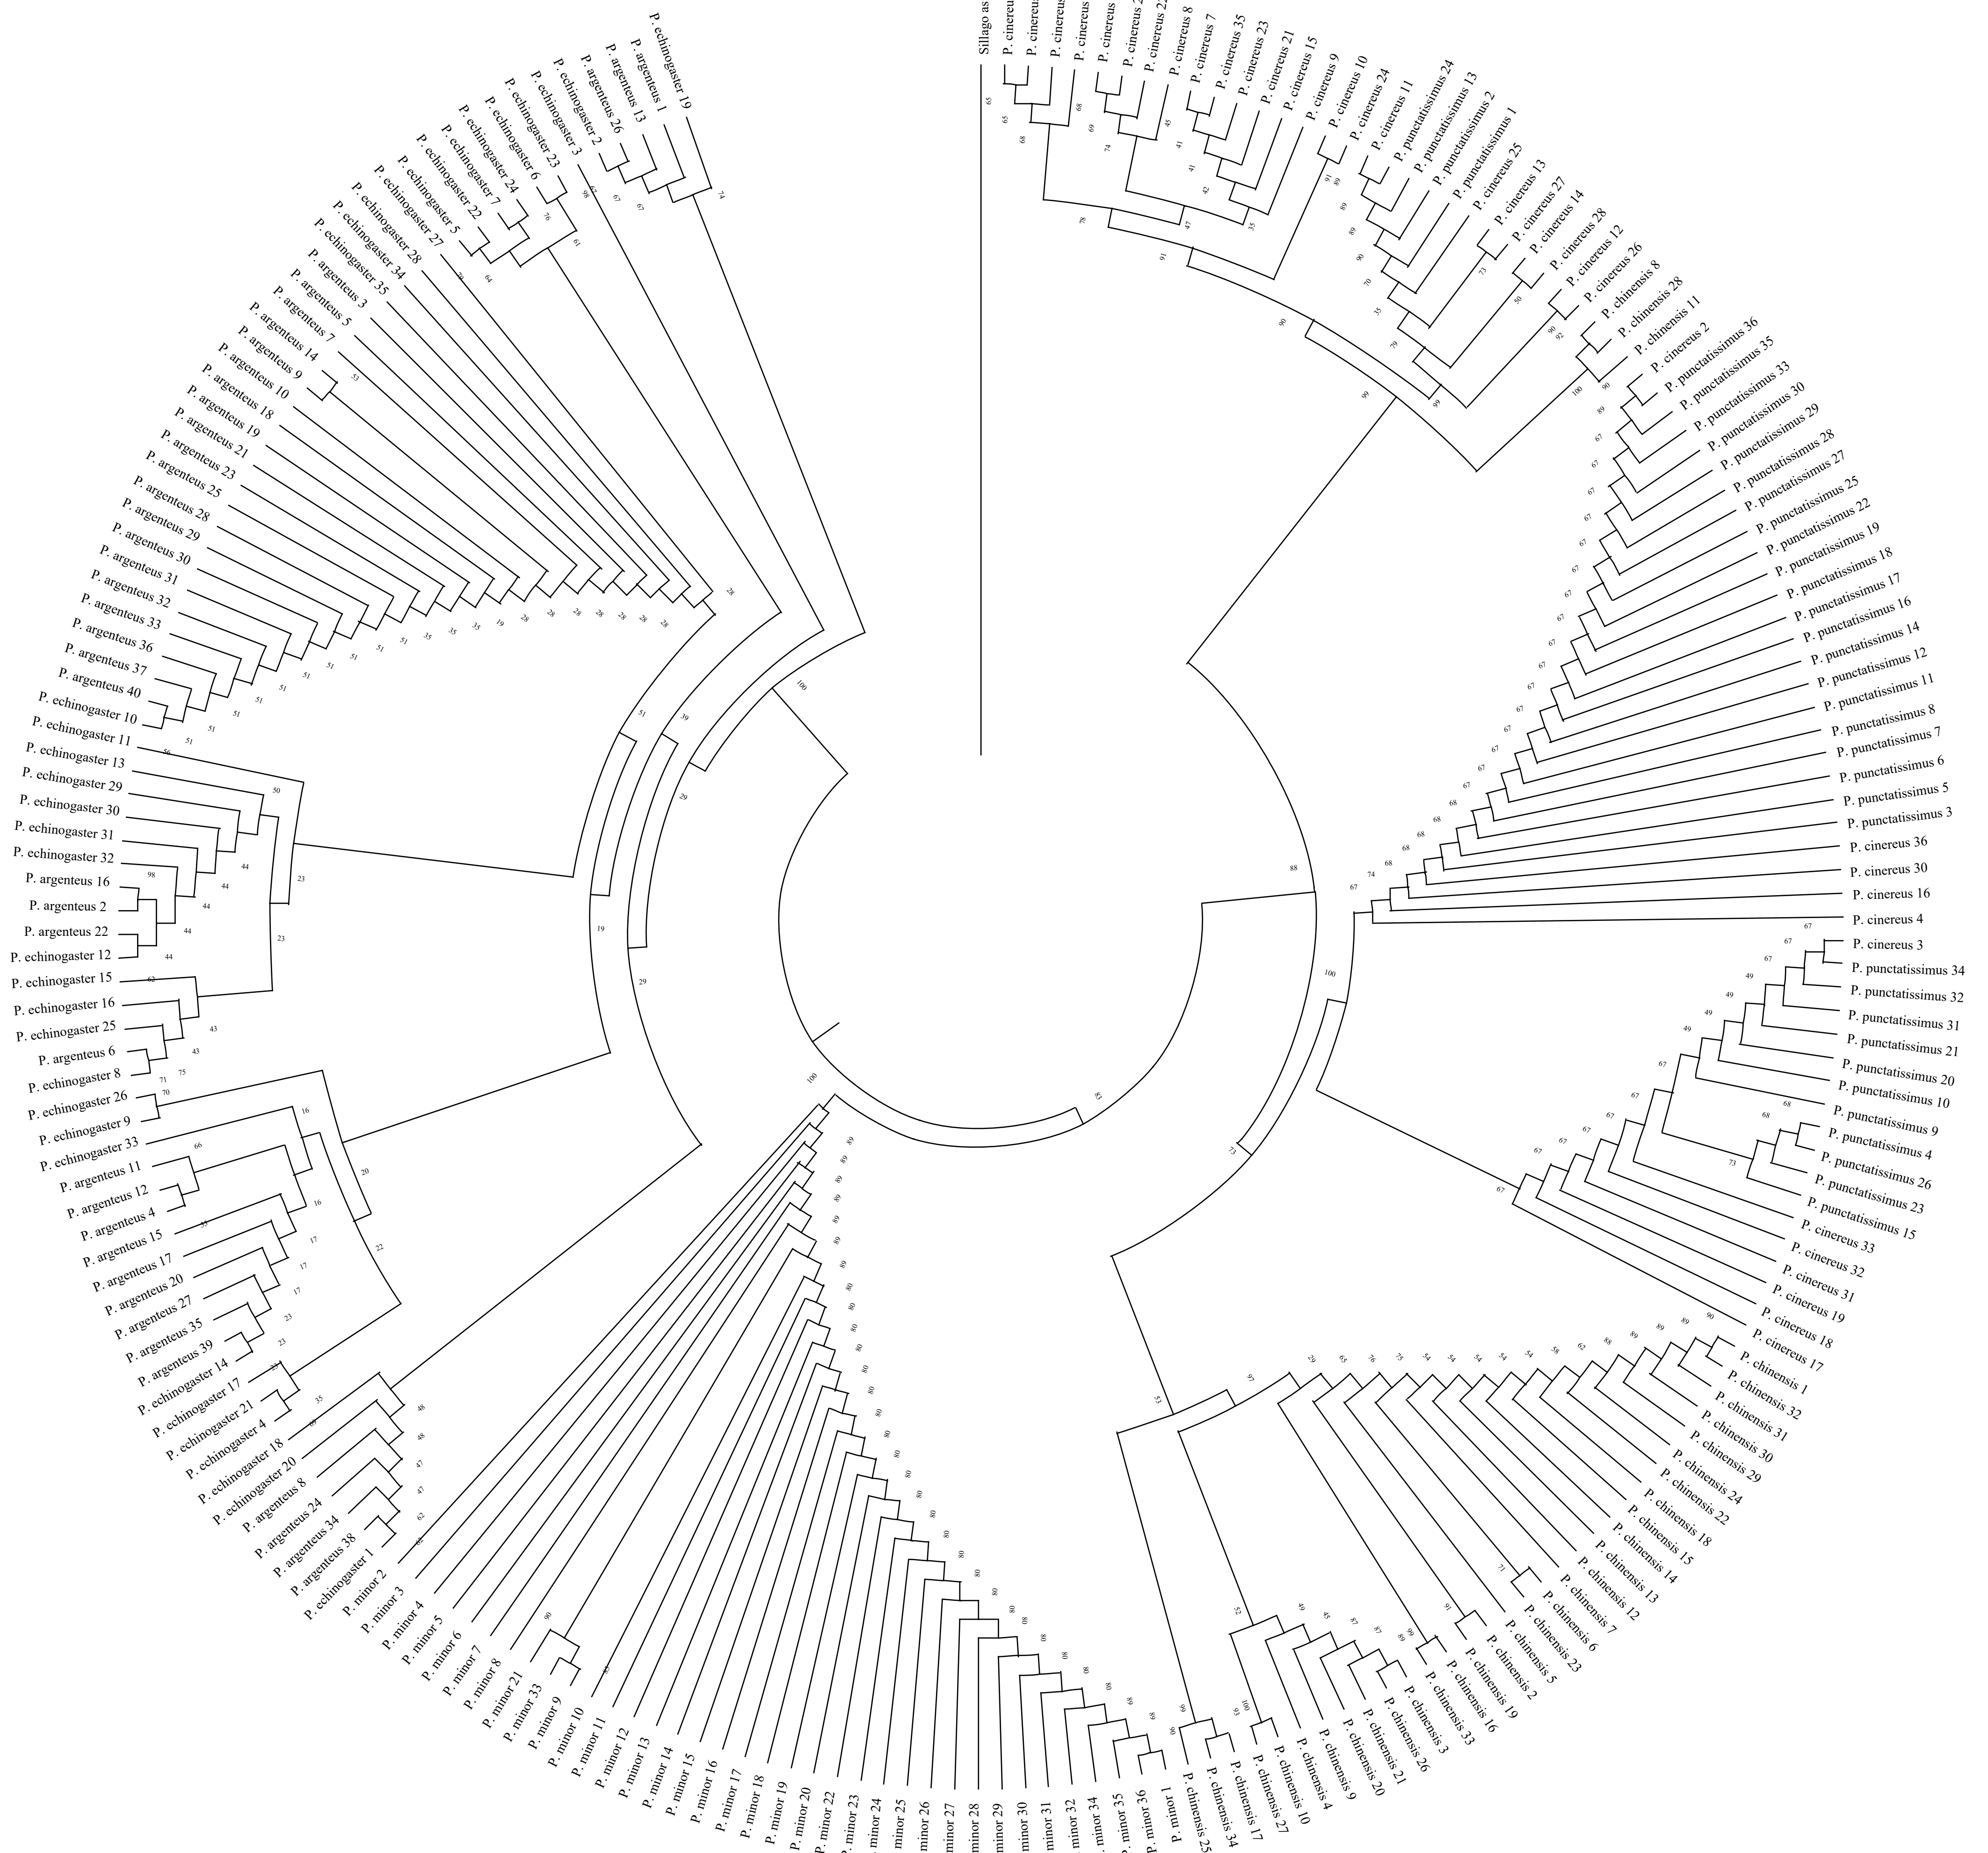

Fig. S11 The maximum parsimony tree of the 217 accessions of *Pampus* species based on inferred *D-loop* sequences. The outgroup was *Sillago asiatica*.
