# Supplementary material for: Comparative Analysis of the Systematics and Evolution of the Pampus Genus of Fish (Perciformes: Stromateidae) Based on Osteology, Population Genetics and Complete Mitogenomes
Source: MDPI journal article supplement (doi:10.3390/ani14050814), 2024-03-06
Supplement: s1 [file s1]

Table S2. Description statistics of the codon number and relative synonymous codon usage (RSCU) in 13 protein coding genes of the genus *Pampus*

| Species                  | Codon                  | Count   | RSCU | Codon   | Count   | RSCU | Codon   | Count   | RSCU | Codon   | Count   | RSCU |      |
|--------------------------|------------------------|---------|------|---------|---------|------|---------|---------|------|---------|---------|------|------|
| <i>P. cinereus</i>       | UUU (F)                | 8.7     | 0.94 | UCU (S) | 3.6     | 1.18 | UAU (Y) | 3.5     | 0.8  | UGU (C) | 0.8     | 0.81 |      |
|                          | UUC (F)                | 9.8     | 1.06 | UCC (S) | 4.7     | 1.54 | UAC (Y) | 5.2     | 1.2  | UGC (C) | 1.2     | 1.19 |      |
|                          | UUA (L)                | 9.5     | 1.15 | UCA (S) | 6.2     | 2.04 | UAA (*) | 0.7     | 0.22 | UGA (*) | 8.5     | 2.73 |      |
|                          | UUG (L)                | 1.7     | 0.2  | UCG (S) | 0.2     | 0.05 | UAG (*) | 0.2     | 0.05 | UGG (W) | 0.5     | 1    |      |
|                          | CUU (L)                | 10.5    | 1.27 | CCU (P) | 4.7     | 1.13 | CAU (H) | 3.2     | 0.79 | CGU (R) | 0.9     | 0.99 |      |
|                          | CUC (L)                | 10.2    | 1.23 | CCC (P) | 5.5     | 1.33 | CAC (H) | 5       | 1.21 | CGC (R) | 0.8     | 0.9  |      |
|                          | CUA (L)                | 15.7    | 1.89 | CCA (P) | 6       | 1.44 | CAA (Q) | 6.6     | 1.83 | CGA (R) | 3.7     | 3.95 |      |
|                          | CUG (L)                | 2.2     | 0.26 | CCG (P) | 0.4     | 0.09 | CAG (Q) | 0.6     | 0.17 | CGG (R) | 0.2     | 0.16 |      |
|                          | AUU (I)                | 13.7    | 1.29 | ACU (T) | 5.8     | 0.95 | AAU (N) | 3       | 0.59 | AGU (S) | 1.1     | 0.35 |      |
|                          | AUC (I)                | 9.3     | 0.88 | ACC (T) | 8.2     | 1.33 | AAC (N) | 7.2     | 1.41 | AGC (S) | 2.5     | 0.83 |      |
|                          | AUA (I)                | 8.8     | 0.83 | ACA (T) | 10.2    | 1.64 | AAA (K) | 5.8     | 1.97 | AGA (R) | 0       | 0    |      |
|                          | AUG (M)                | 3.7     | 1    | ACG (T) | 0.5     | 0.07 | AAG (K) | 0.1     | 0.03 | AGG (R) | 0       | 0    |      |
|                          | GUU (V)                | 5.1     | 1.31 | GCU (A) | 5.8     | 0.94 | GAU (D) | 2.3     | 0.83 | GGU (G) | 3.1     | 0.69 |      |
|                          | GUC (V)                | 2.4     | 0.61 | GCC (A) | 9.7     | 1.57 | GAC (D) | 3.2     | 1.17 | GGC (G) | 5.6     | 1.25 |      |
|                          | GUA (V)                | 6.8     | 1.74 | GCA (A) | 8.5     | 1.38 | GAA (E) | 6.7     | 1.69 | GGA (G) | 7.3     | 1.63 |      |
|                          | GUG (V)                | 1.3     | 0.34 | GCG (A) | 0.7     | 0.11 | GAG (E) | 1.2     | 0.31 | GGG (G) | 1.9     | 0.43 |      |
|                          | UUU (F)                | 9.2     | 0.96 | UCU (S) | 4.4     | 1.38 | UAU (Y) | 4.3     | 1    | UGU (C) | 0.5     | 0.58 |      |
|                          | UUC (F)                | 9.9     | 1.04 | UCC (S) | 3.8     | 1.19 | UAC (Y) | 4.3     | 1    | UGC (C) | 1.3     | 1.42 |      |
|                          | UUA (L)                | 10.8    | 1.34 | UCA (S) | 6.4     | 2.01 | UAA (*) | 0.6     | 0.21 | UGA (*) | 8       | 2.74 |      |
|                          | UUG (L)                | 2       | 0.25 | UCG (S) | 0.5     | 0.17 | UAG (*) | 0.2     | 0.05 | UGG (W) | 1       | 1    |      |
|                          | <i>P. echinogaster</i> | CUU (L) | 11.5 | 1.43    | CCU (P) | 4.9  | 1.22    | CAU (H) | 2.9  | 0.72    | CGU (R) | 0.8  | 0.88 |
|                          |                        | CUC (L) | 6.1  | 0.75    | CCC (P) | 4.9  | 1.22    | CAC (H) | 5.2  | 1.28    | CGC (R) | 0.5  | 0.48 |
|                          |                        | CUA (L) | 15.3 | 1.9     | CCA (P) | 5.5  | 1.36    | CAA (Q) | 6.4  | 1.71    | CGA (R) | 3.8  | 3.92 |
|                          |                        | CUG (L) | 2.7  | 0.33    | CCG (P) | 0.8  | 0.19    | CAG (Q) | 1.1  | 0.29    | CGG (R) | 0.6  | 0.64 |
| AUU (I)                  |                        | 16.4    | 1.49 | ACU (T) | 5.1     | 0.87 | AAU (N) | 5.2     | 0.96 | AGU (S) | 1.2     | 0.36 |      |
| AUC (I)                  |                        | 6.8     | 0.62 | ACC (T) | 8.3     | 1.42 | AAC (N) | 5.6     | 1.04 | AGC (S) | 2.8     | 0.9  |      |
| AUA (I)                  |                        | 9.8     | 0.89 | ACA (T) | 9.5     | 1.62 | AAA (K) | 5.3     | 1.86 | AGA (R) | 0.1     | 0.08 |      |
| AUG (M)                  |                        | 3.5     | 1    | ACG (T) | 0.5     | 0.09 | AAG (K) | 0.4     | 0.14 | AGG (R) | 0       | 0    |      |
| GUU (V)                  |                        | 5.2     | 1.24 | GCU (A) | 6.2     | 1.02 | GAU (D) | 2       | 0.71 | GGU (G) | 3.5     | 0.8  |      |
| GUC (V)                  |                        | 2.7     | 0.65 | GCC (A) | 8.7     | 1.43 | GAC (D) | 3.6     | 1.29 | GGC (G) | 4.8     | 1.11 |      |
| GUA (V)                  |                        | 7.4     | 1.78 | GCA (A) | 8.8     | 1.44 | GAA (E) | 6.6     | 1.7  | GGA (G) | 5.8     | 1.34 |      |
| GUG (V)                  |                        | 1.4     | 0.33 | GCG (A) | 0.7     | 0.11 | GAG (E) | 1.2     | 0.3  | GGG (G) | 3.2     | 0.75 |      |
| UUU (F)                  |                        | 8.2     | 0.87 | UCU (S) | 3.8     | 1.26 | UAU (Y) | 4.2     | 0.98 | UGU (C) | 0.8     | 0.77 |      |
| UUC (F)                  |                        | 10.6    | 1.13 | UCC (S) | 4.5     | 1.52 | UAC (Y) | 4.3     | 1.02 | UGC (C) | 1.2     | 1.23 |      |
| UUA (L)                  |                        | 9.9     | 1.21 | UCA (S) | 5.7     | 1.91 | UAA (*) | 0.8     | 0.26 | UGA (*) | 8.2     | 2.74 |      |
| UUG (L)                  |                        | 1       | 0.12 | UCG (S) | 0.2     | 0.05 | UAG (*) | 0       | 0    | UGG (W) | 0.9     | 1    |      |
| CUU (L)                  |                        | 11.4    | 1.38 | CCU (P) | 4.3     | 1.03 | CAU (H) | 2.8     | 0.69 | CGU (R) | 0.6     | 0.66 |      |
| CUC (L)                  |                        | 9.2     | 1.11 | CCC (P) | 5.9     | 1.42 | CAC (H) | 5.4     | 1.31 | CGC (R) | 1       | 1.07 |      |
| CUA (L)                  |                        | 15.9    | 1.93 | CCA (P) | 6.1     | 1.46 | CAA (Q) | 6.8     | 1.87 | CGA (R) | 3.8     | 4.03 |      |
| CUG (L)                  |                        | 2       | 0.24 | CCG (P) | 0.4     | 0.09 | CAG (Q) | 0.5     | 0.13 | CGG (R) | 0.2     | 0.25 |      |
| <i>P. punctatissimus</i> |                        | AUU (I) | 14.4 | 1.35    | ACU (T) | 4.3  | 0.69    | AAU (N) | 2.5  | 0.51    | AGU (S) | 1.2  | 0.41 |
|                          |                        | AUC (I) | 8.2  | 0.77    | ACC (T) | 9.8  | 1.59    | AAC (N) | 7.4  | 1.49    | AGC (S) | 2.5  | 0.85 |
|                          |                        | AUA (I) | 9.4  | 0.88    | ACA (T) | 10.4 | 1.67    | AAA (K) | 5.8  | 1.92    | AGA (R) | 0    | 0    |
|                          |                        | AUG (M) | 2.8  | 1       | ACG (T) | 0.3  | 0.05    | AAG (K) | 0.2  | 0.08    | AGG (R) | 0    | 0    |
|                          | GUU (V)                | 4.8     | 1.19 | GCU (A) | 5.9     | 0.95 | GAU (D) | 1.6     | 0.58 | GGU (G) | 4.2     | 0.92 |      |
|                          | GUC (V)                | 3.1     | 0.76 | GCC (A) | 9.7     | 1.55 | GAC (D) | 4       | 1.42 | GGC (G) | 4.6     | 1.02 |      |
|                          | GUA (V)                | 6.7     | 1.65 | GCA (A) | 8.8     | 1.42 | GAA (E) | 6.8     | 1.71 | GGA (G) | 6.5     | 1.45 |      |
|                          | GUG (V)                | 1.6     | 0.4  | GCG (A) | 0.5     | 0.09 | GAG (E) | 1.2     | 0.29 | GGG (G) | 2.8     | 0.61 |      |
|                          | UUU (F)                | 8       | 0.86 | UCU (S) | 3.9     | 1.28 | UAU (Y) | 3.8     | 0.91 | UGU (C) | 0.9     | 0.86 |      |
|                          | UUC (F)                | 10.7    | 1.14 | UCC (S) | 4.6     | 1.51 | UAC (Y) | 4.6     | 1.09 | UGC (C) | 1.2     | 1.14 |      |
|                          | UUA (L)                | 8.7     | 1.05 | UCA (S) | 5.7     | 1.86 | UAA (*) | 0.7     | 0.23 | UGA (*) | 8.3     | 2.72 |      |
|                          | UUG (L)                | 1.7     | 0.2  | UCG (S) | 0.4     | 0.13 | UAG (*) | 0.2     | 0.05 | UGG (W) | 0.7     | 1    |      |
|                          | CUU (L)                | 10.8    | 1.3  | CCU (P) | 4.5     | 1.07 | CAU (H) | 3.1     | 0.75 | CGU (R) | 0.8     | 0.82 |      |
|                          | CUC (L)                | 9.8     | 1.18 | CCC (P) | 5.5     | 1.33 | CAC (H) | 5.2     | 1.25 | CGC (R) | 1       | 1.07 |      |
|                          | CUA (L)                | 16.5    | 1.98 | CCA (P) | 6.2     | 1.48 | CAA (Q) | 6.3     | 1.76 | CGA (R) | 3.5     | 3.78 |      |
|                          | CUG (L)                | 2.4     | 0.29 | CCG (P) | 0.5     | 0.11 | CAG (Q) | 0.8     | 0.24 | CGG (R) | 0.3     | 0.33 |      |
|                          | <i>P. liuorum</i>      | AUU (I) | 13.5 | 1.28    | ACU (T) | 5.8  | 0.95    | AAU (N) | 3.1  | 0.62    | AGU (S) | 1    | 0.33 |
|                          |                        | AUC (I) | 9.1  | 0.86    | ACC (T) | 8.2  | 1.34    | AAC (N) | 6.9  | 1.38    | AGC (S) | 2.8  | 0.9  |
|                          |                        | AUA (I) | 9.1  | 0.86    | ACA (T) | 10   | 1.64    | AAA (K) | 5.8  | 1.95    | AGA (R) | 0    | 0    |
|                          |                        | AUG (M) | 3.2  | 1       | ACG (T) | 0.5  | 0.08    | AAG (K) | 0.2  | 0.05    | AGG (R) | 0    | 0    |
|                          |                        | GUU (V) | 4.8  | 1.22    | GCU (A) | 6.1  | 0.97    | GAU (D) | 2.2  | 0.81    | GGU (G) | 3.1  | 0.68 |
|                          |                        | GUC (V) | 2.9  | 0.73    | GCC (A) | 9.6  | 1.53    | GAC (D) | 3.3  | 1.19    | GGC (G) | 5.6  | 1.25 |
|                          |                        | GUA (V) | 6.5  | 1.64    | GCA (A) | 8.9  | 1.42    | GAA (E) | 6.8  | 1.7     | GGA (G) | 7.1  | 1.57 |
|                          |                        | GUG (V) | 1.6  | 0.41    | GCG (A) | 0.5  | 0.09    | GAG (E) | 1.2  | 0.3     | GGG (G) | 2.2  | 0.5  |
| UUU (F)                  |                        | 9.3     | 0.97 | UCU (S) | 4.4     | 1.38 | UAU (Y) | 4.2     | 0.98 | UGU (C) | 0.5     | 0.58 |      |

|                     |         |      |      |         |      |      |         |     |      |         |     |      |
|---------------------|---------|------|------|---------|------|------|---------|-----|------|---------|-----|------|
| <i>P. argenteus</i> | UUC (F) | 9.8  | 1.03 | UCC (S) | 3.8  | 1.19 | UAC (Y) | 4.4 | 1.02 | UGC (C) | 1.3 | 1.42 |
|                     | UUA (L) | 10.8 | 1.34 | UCA (S) | 6.4  | 2.01 | UAA (*) | 0.6 | 0.21 | UGA (*) | 8.2 | 2.74 |
|                     | UUG (L) | 2    | 0.25 | UCG (S) | 0.5  | 0.17 | UAG (*) | 0.2 | 0.05 | UGG (W) | 0.8 | 1    |
|                     | CUU (L) | 11.5 | 1.43 | CCU (P) | 5    | 1.24 | CAU (H) | 2.9 | 0.72 | CGU (R) | 0.8 | 0.88 |
|                     | CUC (L) | 6.2  | 0.76 | CCC (P) | 4.8  | 1.21 | CAC (H) | 5.2 | 1.28 | CGC (R) | 0.5 | 0.48 |
|                     | CUA (L) | 15.2 | 1.88 | CCA (P) | 5.4  | 1.34 | CAA (Q) | 6.3 | 1.69 | CGA (R) | 3.8 | 3.92 |
|                     | CUG (L) | 2.8  | 0.34 | CCG (P) | 0.8  | 0.21 | CAG (Q) | 1.2 | 0.31 | CGG (R) | 0.6 | 0.64 |
|                     | AUU (I) | 16.5 | 1.5  | ACU (T) | 5.1  | 0.87 | AAU (N) | 5.1 | 0.94 | AGU (S) | 1.2 | 0.36 |
|                     | AUC (I) | 6.8  | 0.62 | ACC (T) | 8.3  | 1.42 | AAC (N) | 5.7 | 1.06 | AGC (S) | 2.8 | 0.9  |
|                     | AUA (I) | 9.8  | 0.89 | ACA (T) | 9.5  | 1.62 | AAA (K) | 5.3 | 1.86 | AGA (R) | 0.1 | 0.08 |
|                     | AUG (M) | 3.5  | 1    | ACG (T) | 0.5  | 0.09 | AAG (K) | 0.4 | 0.14 | AGG (R) | 0   | 0    |
|                     | GUU (V) | 5.2  | 1.24 | GCU (A) | 6.2  | 1.01 | GAU (D) | 2   | 0.71 | GGU (G) | 3.5 | 0.82 |
|                     | GUC (V) | 2.6  | 0.63 | GCC (A) | 8.8  | 1.44 | GAC (D) | 3.6 | 1.29 | GGC (G) | 4.7 | 1.09 |
|                     | GUA (V) | 7.5  | 1.81 | GCA (A) | 8.8  | 1.44 | GAA (E) | 6.8 | 1.74 | GGA (G) | 5.9 | 1.38 |
|                     | GUG (V) | 1.3  | 0.31 | GCG (A) | 0.7  | 0.11 | GAG (E) | 1   | 0.26 | GGG (G) | 3.1 | 0.71 |
|                     | UUU (S) | 10.2 | 1.1  | UCU (S) | 4.6  | 1.41 | UAU (Y) | 6.5 | 1.27 | UGU (C) | 1   | 1.04 |
|                     | UUC (F) | 8.3  | 0.9  | UCC (S) | 4.7  | 1.43 | UAC (Y) | 3.7 | 0.73 | UGC (C) | 0.9 | 0.96 |
|                     | UUA (L) | 13.3 | 1.67 | UCA (S) | 6.2  | 1.88 | UAA (*) | 0.6 | 0.22 | UGA (*) | 7.7 | 2.7  |
|                     | UUG (L) | 1.5  | 0.19 | UCG (S) | 0.3  | 0.09 | UAG (*) | 0.2 | 0.08 | UGG (W) | 1   | 1    |
|                     | CUU (L) | 11.8 | 1.48 | CCU (P) | 5.4  | 1.33 | CAU (H) | 4.3 | 1.12 | CGU (R) | 0.8 | 0.86 |
|                     | CUC (L) | 5.6  | 0.71 | CCC (P) | 4.3  | 1.07 | CAC (H) | 3.4 | 0.88 | CGC (R) | 0.7 | 0.77 |
|                     | CUA (L) | 13.9 | 1.75 | CCA (P) | 6.2  | 1.52 | CAA (Q) | 6.8 | 1.78 | CGA (R) | 3.6 | 4.03 |
|                     | CUG (L) | 1.6  | 0.2  | CCG (P) | 0.3  | 0.08 | CAG (Q) | 0.8 | 0.22 | CGG (R) | 0.3 | 0.34 |
| <i>P. minor</i>     | AUU (I) | 17.4 | 1.51 | ACU (T) | 5.8  | 0.98 | AAU (N) | 5.9 | 1.14 | AGU (S) | 1.2 | 0.38 |
|                     | AUC (I) | 5.8  | 0.5  | ACC (T) | 7.3  | 1.24 | AAC (N) | 4.5 | 0.86 | AGC (S) | 2.7 | 0.82 |
|                     | AUA (I) | 11.5 | 0.99 | ACA (T) | 9.8  | 1.67 | AAA (K) | 6.1 | 1.86 | AGA (R) | 0   | 0    |
|                     | AUG (M) | 3.1  | 1    | ACG (T) | 0.6  | 0.1  | AAG (K) | 0.5 | 0.14 | AGG (R) | 0   | 0    |
|                     | GUU (V) | 5    | 1.26 | GCU (A) | 6.5  | 1.11 | GAU (D) | 2.7 | 1.06 | GGU (G) | 3.6 | 0.81 |
|                     | GUC (V) | 2.2  | 0.54 | GCC (A) | 7.9  | 1.35 | GAC (D) | 2.4 | 0.94 | GGC (G) | 4.2 | 0.95 |
|                     | GUA (V) | 7.2  | 1.8  | GCA (A) | 8.8  | 1.49 | GAA (E) | 6.5 | 1.75 | GGA (G) | 7.2 | 1.62 |
|                     | GUG (V) | 1.6  | 0.41 | GCG (A) | 0.3  | 0.05 | GAG (E) | 0.9 | 0.25 | GGG (G) | 2.8 | 0.62 |
|                     | UUU (F) | 7.8  | 0.84 | UCU (S) | 2.7  | 0.9  | UAU (Y) | 3.8 | 0.91 | UGU (C) | 0.8 | 0.77 |
|                     | UUC (F) | 10.8 | 1.16 | UCC (S) | 5.9  | 1.97 | UAC (Y) | 4.5 | 1.09 | UGC (C) | 1.2 | 1.23 |
|                     | UUA (L) | 9.4  | 1.15 | UCA (S) | 5.4  | 1.79 | UAA (*) | 0.8 | 0.27 | UGA (*) | 7.9 | 2.73 |
|                     | UUG (L) | 1.6  | 0.2  | UCG (S) | 0.5  | 0.15 | UAG (*) | 0   | 0    | UGG (W) | 1.2 | 1    |
|                     | CUU (L) | 10.5 | 1.29 | CCU (P) | 3.6  | 0.87 | CAU (H) | 2.6 | 0.62 | CGU (R) | 0.7 | 0.74 |
|                     | CUC (L) | 10.2 | 1.25 | CCC (P) | 6.7  | 1.62 | CAC (H) | 5.8 | 1.38 | CGC (R) | 0.9 | 0.99 |
|                     | CUA (L) | 15.3 | 1.88 | CCA (P) | 5.5  | 1.34 | CAA (Q) | 6.8 | 1.93 | CGA (R) | 3.7 | 3.95 |
|                     | CUG (L) | 1.9  | 0.24 | CCG (P) | 0.7  | 0.17 | CAG (Q) | 0.2 | 0.07 | CGG (R) | 0.3 | 0.33 |
| <i>P. chinensis</i> | AUU (I) | 13.9 | 1.31 | ACU (T) | 4.2  | 0.69 | AAU (N) | 2.3 | 0.47 | AGU (S) | 1.2 | 0.38 |
|                     | AUC (I) | 8.7  | 0.82 | ACC (T) | 9.7  | 1.59 | AAC (N) | 7.6 | 1.53 | AGC (S) | 2.4 | 0.79 |
|                     | AUA (I) | 9.3  | 0.87 | ACA (T) | 10.1 | 1.65 | AAA (K) | 5.6 | 1.87 | AGA (R) | 0   | 0    |
|                     | AUG (M) | 2.8  | 1    | ACG (T) | 0.4  | 0.06 | AAG (K) | 0.4 | 0.13 | AGG (R) | 0   | 0    |
|                     | GUU (V) | 4.8  | 1.18 | GCU (A) | 5.5  | 0.87 | GAU (D) | 1.7 | 0.6  | GGU (G) | 4.5 | 0.99 |
|                     | GUC (V) | 3.4  | 0.83 | GCC (A) | 10.3 | 1.65 | GAC (D) | 3.9 | 1.4  | GGC (G) | 4.7 | 1.04 |
|                     | GUA (V) | 5.9  | 1.46 | GCA (A) | 8.5  | 1.35 | GAA (E) | 6.9 | 1.75 | GGA (G) | 6.1 | 1.35 |
|                     | GUG (V) | 2.2  | 0.53 | GCG (A) | 0.8  | 0.12 | GAG (E) | 1   | 0.25 | GGG (G) | 2.8 | 0.62 |
