# Supplementary material for: Comparative Analysis of the Systematics and Evolution of the Pampus Genus of Fish (Perciformes: Stromateidae) Based on Osteology, Population Genetics and Complete Mitogenomes
Source: MDPI journal article supplement (doi:10.3390/ani14050814), 2024-03-06
Supplement: s1 [file s1]

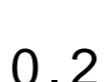

Fig. S6 Phylogenetic relationships derived from maximum likelihood based on the *D-loop* nucleotide sequences of the six *Pampus* populations. Numbers in the nodes are ML bootstrap proportions
